# Supplementary material for: Dearomatizing conversion of pyrazines to 1,4-dihydropyrazine derivatives via transition-metal-free diboration, silaboration, and hydroboration
Source: Royal Society of Chemistry journal article supplement (doi:10.1039/c2cc34086k), 2012-01-01

## Supporting Information

# Dearomatizing Conversion of Pyrazines to 1,4-Dihydropyrazine Derivatives via Transition-Metal-Free Diboration, Silaboration, and Hydroboration

Kazuyuki Oshima, Toshimichi Ohmura\* and Michinori Suginome\*

*Department of Synthetic Chemistry and Biological Chemistry, Graduate School of Engineering,  
Kyoto University, Katsura, Nishikyo-ku, Kyoto 615-8510, Japan*  
ohmura@sbchem.kyoto-u.ac.jp; suginome@sbchem.kyoto-u.ac.jp

## Contents

1. General ----- S2
2. Materials ----- S2
3. Diboration of Pyrazine (**1a**) with **2** (eq 1) ----- S2
4. Diboration of Substituted Pyrazines **1b-1f** (Table 1) ----- S3
5. Diboration of Pyrazine (**1a**) with **4** (eq 2) ----- S6
6. Silaboration of Pyrazine (**1a**) (eq 3) ----- S6
7. Hydroboration of Pyrazine (**1a**) (eq 4) ----- S7
8. <sup>1</sup>H, <sup>13</sup>C, and <sup>11</sup>B NMR spectra of **3a-f**, **5**, **7**, and **9** ----- S7

## 1. General

All reactions were performed in a drybox under an atmosphere of nitrogen with magnetic stirring.  $^1\text{H}$  NMR spectra were recorded on Varian Mercury-400 (400.44 MHz) or 400MR (399.88 MHz) spectrometers.  $^{13}\text{C}$  NMR spectra were recorded on a JEOL JNM-A500 (125.65 MHz) spectrometer.  $^{11}\text{B}$  NMR spectra were recorded on Varian Mercury-400 (128.48 MHz) or 400MR (128.30 MHz) spectrometers.  $^1\text{H}$  NMR data were reported as follows: chemical shift in ppm downfield from tetramethylsilane, multiplicity (s = singlet, d = doublet, t = triplet, q = quartet, and m = multiplet), coupling constant ( $J$ ), and integration.  $^{13}\text{C}$  NMR data were reported in ppm downfield from tetramethylsilane.  $^{11}\text{B}$  NMR data were reported in ppm downfield from  $\text{BF}_3\cdot\text{OEt}_2$ . High resolution mass spectra were recorded on a JEOL JMS-SX102A (EI) spectrometer.

## 2. Materials

THF and pentane were dried and degassed by The Ultimate Solvent System (GlassContour). Bis(pinacolato)diboron (**2**) and 5,5,5',5'-tetramethyl-2,2'-bi-1,3,2-dioxaborinane (**3**) were purchased from Allychem and were purified by recrystallization before use. A silylboronic ester **6**<sup>1</sup> and pinacolborane (**8**)<sup>2</sup> and were synthesized by the method reported previously. Pyrazine (**1a**) (Aldrich), 2-methylpyrazine (**1b**), 2-pyrazinecarbonitrile (**1e**) (Wako), 2-methoxypyrazine (**1c**), methyl 2-pyrazinecarboxylate (**1d**), and 2,6-dimethylpyrazine (**1f**) (TCI) were used as received from commercial sources.

## 3. Diboration of Pyrazine (**1a**) with **2** (eq 1)

**A Procedure for THF as a Solvent:** In a drybox, pyrazine (**1a**, 36 mg, 0.45 mmol) and bis(pinacolato)diboron (**2**, 103 mg, 0.40 mmol) were placed in a screw-capped vial equipped with a magnetic stirrer bar. THF (0.4 mL) was added to the vial and the vial was capped by a screw cap. The

---

(1) T. Ohmura, K. Masuda, H. Furukawa, M. Suginome, *Organometallics* 2007, **26**, 1291.

solution was stirred magnetically in the drybox at room temperature. After 2 h the reaction mixture was concentrated in vacuo to remove volatiles including remaining **1a**. The *N,N'*-diboryl-1,4-dihydropyrazine **3a** (126 mg, 93%) was obtained as a white solid with high purity.

**A Procedure for Pentane as a Solvent:** In a drybox, pyrazine (**1a**, 35 mg, 0.44 mmol) and bis(pinacolato)diboron (**2**, 103 mg, 0.40 mmol) were placed in a screw-capped vial equipped with a magnetic stirrer bar. Pentane (0.4 mL) was added to the vial and the vial was capped by a screw cap. The solution was stirred magnetically in the drybox at room temperature. A white solid was precipitated. After 2 h the solution was removed by decantation, and the solid was washed with pentane (0.2 mL x 2) and dried in vacuo. The *N,N'*-diboryl-1,4-dihydropyrazine **3a** (122 mg, 90%) was obtained as a white solid with high purity.

#### 1,4-Bis(4,4,5,5-tetramethyl-1,3,2-dioxaborolan-2-yl)-1,4-dihydropyrazine (**3a**)

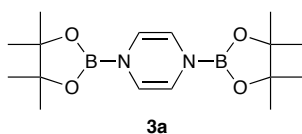

**3a:**  $^1\text{H}$  NMR (400 MHz,  $\text{CDCl}_3$ )  $\delta$  5.13 (s, 4H), 1.19 (s, 24H).  $^{13}\text{C}$  NMR (126 MHz,  $\text{CDCl}_3$ )  $\delta$  113.2, 83.0, 24.5.  $^{11}\text{B}$  NMR (128 MHz,  $\text{CDCl}_3$ )  $\delta$  21.8. HRMS (EI)  $m/z$  calcd for  $\text{C}_{16}\text{H}_{28}\text{B}_2\text{N}_2\text{O}_4$  ( $\text{M}^+$ ): 334.2235, found: 334.2249.

#### 4. Diboration of Substituted Pyrazines 1b-1f (Table 1)

**General Procedure for Diboration of Substituted Pyrazines:** In a drybox, pyrazine **1** (0.44 mmol) and bis(pinacolato)diboron (**2**, 102 mg, 0.40 mmol) were placed in a screw-capped vial equipped with a magnetic stirrer bar. Pentane (0.4 mL) was added to the vial and the vial was capped by a screw cap. The solution was stirred magnetically in the drybox at room temperature. A white solid was precipitated. After 2 h the solution was removed by decantation, and the solid was washed with pentane (0.2 mL x 2) and dried in vacuo. The *N,N'*-diboryl-1,4-dihydropyrazine **3** was obtained with high purity.

---

(2) C. E. Tucker, J. Davidson, P. Knochel, *J. Org. Chem.* 1992, **57**, 3484.

### 2-Methyl-1,4-bis(4,4,5,5-tetramethyl-1,3,2-dioxaborolan-2-yl)-1,4-dihydropyrazine (**3b**, entry 1)

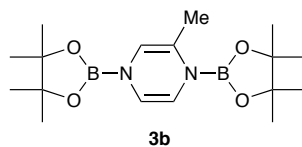

According to the general procedure, 2-methylpyrazine (**1b**, 45 mg, 0.48 mmol) was reacted with **2** (103 mg, 0.40 mmol). The product **3b** (125 mg, 89%) was obtained as a white solid. **3b**:  $^1\text{H}$  NMR (400 MHz,  $\text{CDCl}_3$ )  $\delta$  5.36 (d,  $J = 6.0$  Hz, 1H), 5.29 (dd,  $J = 6.0, 1.2$  Hz, 1H), 5.05 (quintet,  $J = 1.2$  Hz, 1H), 1.63 (d,  $J = 1.2$  Hz, 3H), 1.19 (s, 12H), 1.18 (s, 12H).  $^{13}\text{C}$  NMR (126 MHz,  $\text{CDCl}_3$ )  $\delta$  121.9, 114.3, 113.2, 110.4, 82.9, 82.3, 24.5, 24.4, 18.2.  $^{11}\text{B}$  NMR (128 MHz,  $\text{CDCl}_3$ )  $\delta$  22.0. HRMS (EI)  $m/z$  calcd for  $\text{C}_{17}\text{H}_{30}\text{B}_2\text{N}_2\text{O}_4$  ( $\text{M}^+$ ): 348.2392, found: 348.2397.

### 2-Methoxy-1,4-bis(4,4,5,5-tetramethyl-1,3,2-dioxaborolan-2-yl)-1,4-dihydropyrazine (**3c**, entry 2)

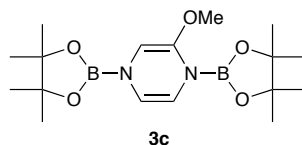

According to the general procedure, 2-methoxypyrazine (**1c**, 48 mg, 0.44 mmol) was reacted with **2** (103 mg, 0.40 mmol). The product **3c** (119 mg, 81%) was obtained as a white solid. **3c**:  $^1\text{H}$  NMR (400 MHz,  $\text{CDCl}_3$ )  $\delta$  6.04 (d,  $J = 4.8$  Hz, 1H), 5.95 (d,  $J = 4.8$  Hz, 1H), 4.13 (s, 1H), 3.74 (s, 3H), 1.23 (s, 24H).  $^{13}\text{C}$  NMR (126 MHz,  $\text{CDCl}_3$ )  $\delta$  156.7, 116.1, 115.9, 83.2, 53.0, 47.5, 25.1, 24.3.  $^{11}\text{B}$  NMR (128 MHz,  $\text{CDCl}_3$ )  $\delta$  23.1. HRMS (EI)  $m/z$  calcd for  $\text{C}_{17}\text{H}_{30}\text{B}_2\text{N}_2\text{O}_5$  ( $\text{M}^+$ ): 364.2341, found: 364.2331.

### Methyl 1,4-bis(4,4,5,5-tetramethyl-1,3,2-dioxaborolan-2-yl)-1,4-dihydropyrazine-2-carboxylate (**3d**, entry 3)

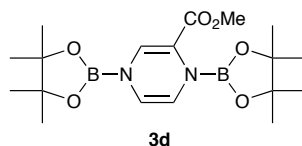

According to the general procedure, methyl 2-pyrazinecarboxylate (**1d**, 61 mg, 0.44 mmol) was reacted with **2** (108 mg, 0.42 mmol). The product **3d** (156 mg, 93%) was obtained as a yellow solid. **3d**:

$^1\text{H}$  NMR (400 MHz,  $\text{CDCl}_3$ )  $\delta$  6.60 (s, 1H), 5.49 (d,  $J = 5.6$  Hz, 1H), 5.35 (d,  $J = 5.6$  Hz, 1H), 3.69 (s, 3H), 1.222 (s, 12H), 1.216 (s, 12H).  $^{13}\text{C}$  NMR (126 MHz,  $\text{CDCl}_3$ )  $\delta$  165.0, 130.3, 116.6, 116.4, 114.0, 83.7, 82.8, 51.2, 24.41, 24.40.  $^{11}\text{B}$  NMR (128 MHz,  $\text{CDCl}_3$ )  $\delta$  22.3. HRMS (EI)  $m/z$  calcd for  $\text{C}_{18}\text{H}_{30}\text{B}_2\text{N}_2\text{O}_6$  ( $\text{M}^+$ ): 392.2290, found: 392.2279.

#### 2-Cyano-1,4-bis(4,4,5,5-tetramethyl-1,3,2-dioxaborolan-2-yl)-1,4-dihydropyrazine (**3e**, entry 4)

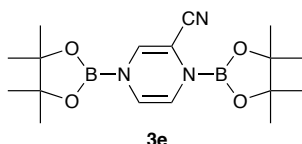

According to the general procedure, 2-pyrazinecarbonitril (**1e**, 45 mg, 0.43 mmol) was reacted with **2** (103 mg, 0.40 mmol). The product **3e** (140 mg, 96%) was obtained as a yellow solid. **3e**:  $^1\text{H}$  NMR (400 MHz,  $\text{CDCl}_3$ )  $\delta$  5.99 (d,  $J = 1.2$  Hz, 1H), 5.25 (d,  $J = 6.4$  Hz, 1H), 5.08 (dd,  $J = 6.4, 1.2$  Hz, 1H), 1.22 (s, 12H), 1.21 (s, 12H).  $^{13}\text{C}$  NMR (126 MHz,  $\text{CDCl}_3$ )  $\delta$  132.2, 115.6, 115.4, 112.1, 99.6, 84.1, 83.6, 24.43, 24.38.  $^{11}\text{B}$  NMR (128 MHz,  $\text{CDCl}_3$ )  $\delta$  21.9. HRMS (EI)  $m/z$  calcd for  $\text{C}_{17}\text{H}_{27}\text{B}_2\text{N}_3\text{O}_4$  ( $\text{M}^+$ ): 359.2188, found: 359.2182.

#### 2,6-Dimethyl-1,4-bis(4,4,5,5-tetramethyl-1,3,2-dioxaborolan-2-yl)-1,4-dihydropyrazine (**3f**, entry 5)

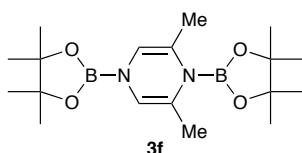

According to the general procedure, 2,6-dimethylpyrazine (**1f**, 48 mg, 0.45 mmol) was reacted with **2** (98 mg, 0.39 mmol). The product **3f** (107 mg, 77%) was obtained as a white solid. This compound was gradually decomposed in  $\text{CDCl}_3$ . **3f**:  $^1\text{H}$  NMR (400 MHz,  $\text{C}_6\text{D}_6$ )  $\delta$  5.96 (q,  $J = 1.2$  Hz, 2H), 2.04 (d,  $J = 1.2$  Hz, 6H), 1.01 (s, 12H), 0.97 (s, 12H).  $^{13}\text{C}$  NMR (126 MHz,  $\text{C}_6\text{D}_6$ )  $\delta$  123.7, 115.9, 82.9, 81.9, 24.7, 24.5, 18.4.  $^{11}\text{B}$  NMR (128 MHz,  $\text{CDCl}_3$ )  $\delta$  22.8. HRMS (EI)  $m/z$  calcd for  $\text{C}_{18}\text{H}_{32}\text{B}_2\text{N}_2\text{O}_4$  ( $\text{M}^+$ ): 362.2548, found: 362.2538.

## 5. Diboration of Pyrazine (1a) with 4 (eq 2)

In a drybox, pyrazine (**1a**, 36 mg, 0.45 mmol) and 5,5,5',5'-tetramethyl-2,2'-bi-1,3,2-dioxaborinane (**4**, 88 mg, 0.39 mmol) were placed in a screw-capped vial equipped with a magnetic stirrer bar. THF (0.4 mL) was added to the vial and the vial was capped by a screw cap. The solution was stirred magnetically in the drybox at room temperature. After 24 h the reaction mixture was concentrated in vacuo to remove volatiles including remaining **1a**. The *N,N'*-diboryl-1,4-dihydropyrazine **5** (107 mg, 90%) was obtained as a white solid with high purity.

### 1,4-Bis-(5,5-dimethyl-1,3,2-dioxaborinan-2-yl)-1,4-dihydropyrazine (5)

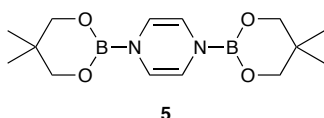

**5**:  $^1\text{H}$  NMR (400 MHz,  $\text{CDCl}_3$ )  $\delta$  5.18 (s, 4H), 3.54 (s, 8H), 0.91 (s, 12H).  $^{13}\text{C}$  NMR (126 MHz,  $\text{CDCl}_3$ )  $\delta$  112.5, 72.4, 32.1, 21.7.  $^{11}\text{B}$  NMR (128 MHz,  $\text{CDCl}_3$ )  $\delta$  17.6. HRMS (EI)  $m/z$  calcd for  $\text{C}_{14}\text{H}_{24}\text{B}_2\text{N}_2\text{O}_4$  ( $\text{M}^+$ ): 306.1922, found: 306.1928.

## 6. Silaboration of Pyrazine (1a) (eq 3)

In a drybox, pyrazine (**1a**, 35 mg, 0.43 mmol) was placed in a screw-capped vial equipped with a magnetic stirrer bar. THF (0.4 mL) and 2-(chlorodimethylsilyl)-4,4,5,5-tetramethyl-1,3,2-dioxaborolane (**6**, 87 mg, 0.39 mmol) were added to the vial and the vial was capped by a screw cap. The solution was stirred magnetically in the drybox at room temperature. After 24 h the reaction mixture was concentrated in vacuo to remove volatiles including remaining **1a**. The *N*-boryl-*N'*-silyl-1,4-dihydropyrazine **7** (97 mg, 82%) was obtained with high purity.

### 1-(Chlorodimethylsilyl)-4-(4,4,5,5-tetramethyl-1,3,2-dioxaborolan-2-yl)-1,4-dihydropyrazine (7)

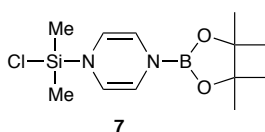

**7**:  $^1\text{H}$  NMR (400 MHz,  $\text{CDCl}_3$ )  $\delta$  5.12 (d,  $J = 6.0$  Hz, 2H), 4.85 (d,  $J = 6.0$  Hz, 2H), 1.19 (s, 12H), 0.44

(s, 6H).  $^{13}\text{C}$  NMR (126 MHz,  $\text{CDCl}_3$ )  $\delta$  113.8, 113.3, 83.0, 24.5, 0.5.  $^{11}\text{B}$  NMR (128 MHz,  $\text{CDCl}_3$ )  $\delta$  21.8.  
HRMS (EI)  $m/z$  calcd for  $\text{C}_{12}\text{H}_{22}\text{BCIN}_2\text{O}_2\text{Si}$  ( $\text{M}^+$ ):300.1232, found: 300.1238.

## 7. Hydroboration of Pyrazine (1a) (eq 4)

In a drybox, pyrazine (**1a**, 32 mg, 0.39 mmol) was placed in a screw-capped vial equipped with a magnetic stirrer bar. THF (0.4 mL) and pinacolborane (**8**, 114 mg, 0.89 mmol) were added to the vial and the vial was capped by a screw cap. The solution was stirred magnetically in the drybox at 50 °C. After 72 h the reaction mixture was concentrated in vacuo to remove volatiles including remaining **8**. The *N,N'*-diboryl-1,2,3,4-tetrahydropyrazine **9** (114 mg, 87%) was obtained as a white solid with high purity.

### 1,4-Bis(4,4,5,5-tetramethyl-1,3,2-dioxaborolan-2-yl)-1,2,3,4-tetrahydropyrazine (**9**)

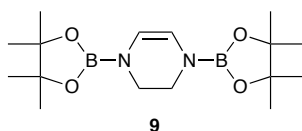

**9**:  $^1\text{H}$  NMR (400 MHz,  $\text{CDCl}_3$ )  $\delta$  5.66 (s, 2H), 3.31 (s, 4H), 1.22 (s, 24H).  $^{13}\text{C}$  NMR (126 MHz,  $\text{CDCl}_3$ )  $\delta$  110.4, 82.6, 41.9, 24.6.  $^{11}\text{B}$  NMR (128 MHz,  $\text{CDCl}_3$ )  $\delta$  22.7. HRMS (EI)  $m/z$  calcd for  $\text{C}_{16}\text{H}_{30}\text{B}_2\text{N}_2\text{O}_4$  ( $\text{M}^+$ ): 336.2392, found: 336.2390.

## 8. $^1\text{H}$ , $^{13}\text{C}$ , and $^{11}\text{B}$ NMR spectra of **3a-f**, **5**, **7**, and **9**

$^1\text{H}$ ,  $^{13}\text{C}$ , and  $^{11}\text{B}$  NMR spectra of **3a-f**, **5**, **7**, and **9** are shown in following pages.

STANDARD PROTON PARAMETERS

File: home/vnmr1/vnmrSYS/data/oshima/K03247-H-CDCl3.fid

Pulse Sequence: s2pul

Solvent: cdcl3  
Ambient temperature  
Operator: vnmr1  
File: K03247-H-CDCl3  
VNMRS-400 "400MR-2nd"

Relax. delay 1.500 sec  
Pulse 45.0 degrees  
Acq. time 3.500 sec  
Width 6410.3 Hz  
8 repetitions

OBSERVE H1, 399.8835282 MHZ  
DATA PROCESSING  
Line broadening 0.2 Hz  
FT size 65536  
Total time 10 min, 40 sec

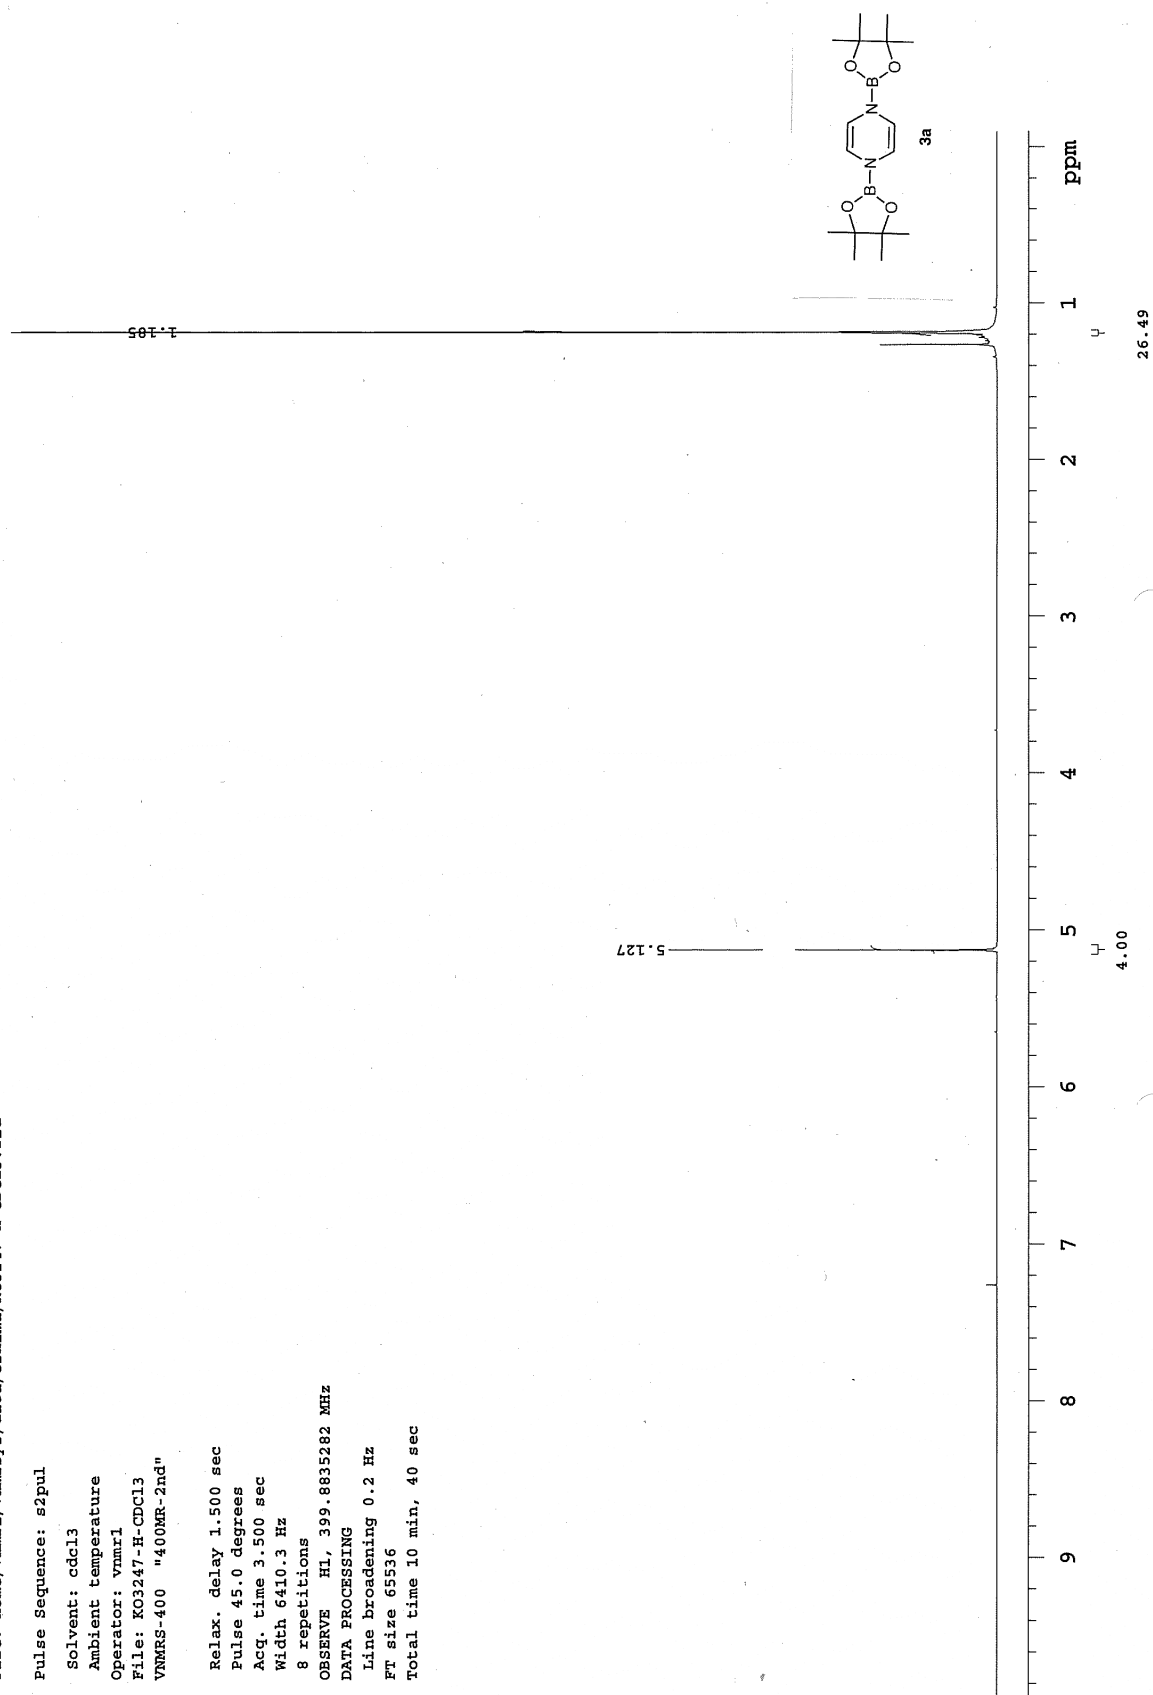



DFILE DEFAULT.ALS  
COMNT PMIXTURE-2  
DATIM Fri Mar 02 16:16:49 20  
ORNUC 13C  
EXMOD SINGL  
OBFRQ 125.65 MHz  
OBFIN 128449.48 Hz  
POINT 32768  
FREQU 28011.20 Hz  
SCANS 160  
ACQTM 1.1698 sec  
PD 2.0000 sec  
PWL 4.50 usec  
IRNUC 1H  
CTEMP 19.2 c  
SOLVT CDCL3  
SLVNT CDCL3  
EXREF 77.00 ppm  
BF 0.16 Hz  
RGAIN 33

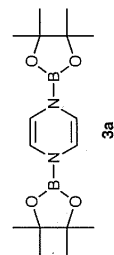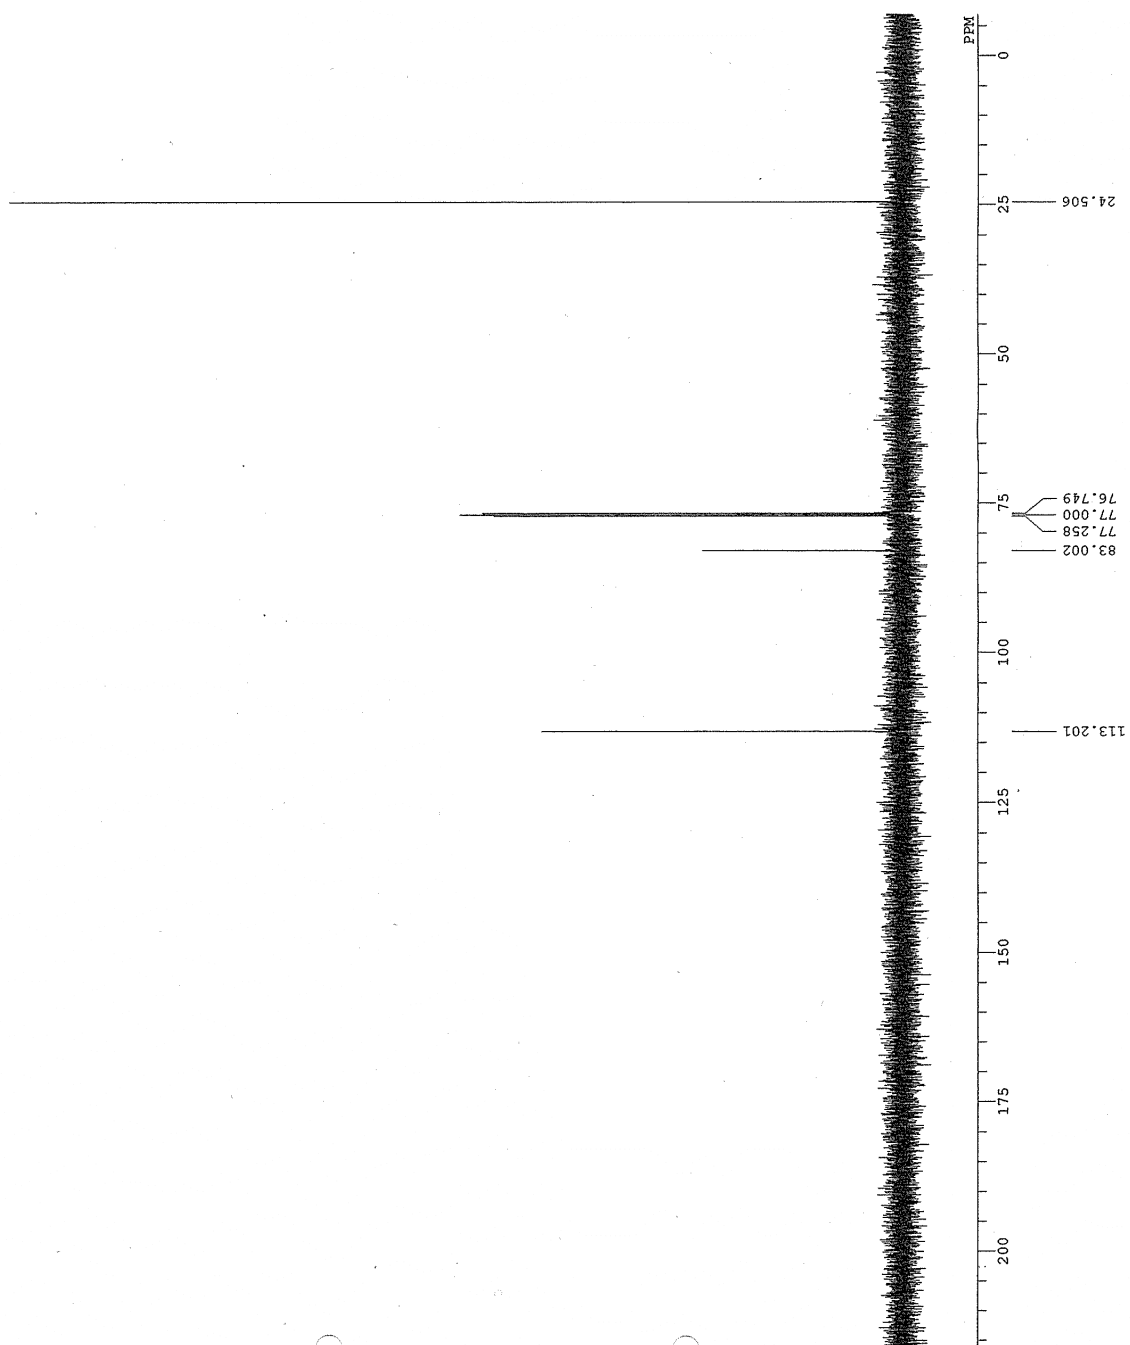

STANDARD CARBON PARAMETERS

File: home/vnmr1/vnmrsys/data/oshima/KO3247-B-CDCl3.fid

Pulse Sequence: s2pul

Solvent:  $\text{CDCl}_3$

Ambient temperature

Operator: vnmr1

File: KO3247-B-CDCl3

VNMR-400 "400MR-2nd"

Relax. delay 1.371 sec

Pulse 45.0 degrees

Acq. time 0.629 sec

Width 26041.7 Hz

12 repetitions

OBSERVE B11, 128.2985537 MHz

DECOUPLE H1, 399.8855705 MHz

Power 42 dB

on during acquisition

off during delay

WALTZ-16 modulated

DATA PROCESSING

Line broadening 5.0 Hz

FT size 32768

Total time 17 min, 4 sec

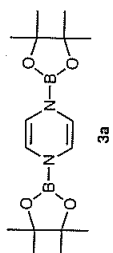

Broad background signal from NMR tube is observed because we used a NMR tube made of borosilicate glass. For the background signal, see the final page of this Supporting Information.

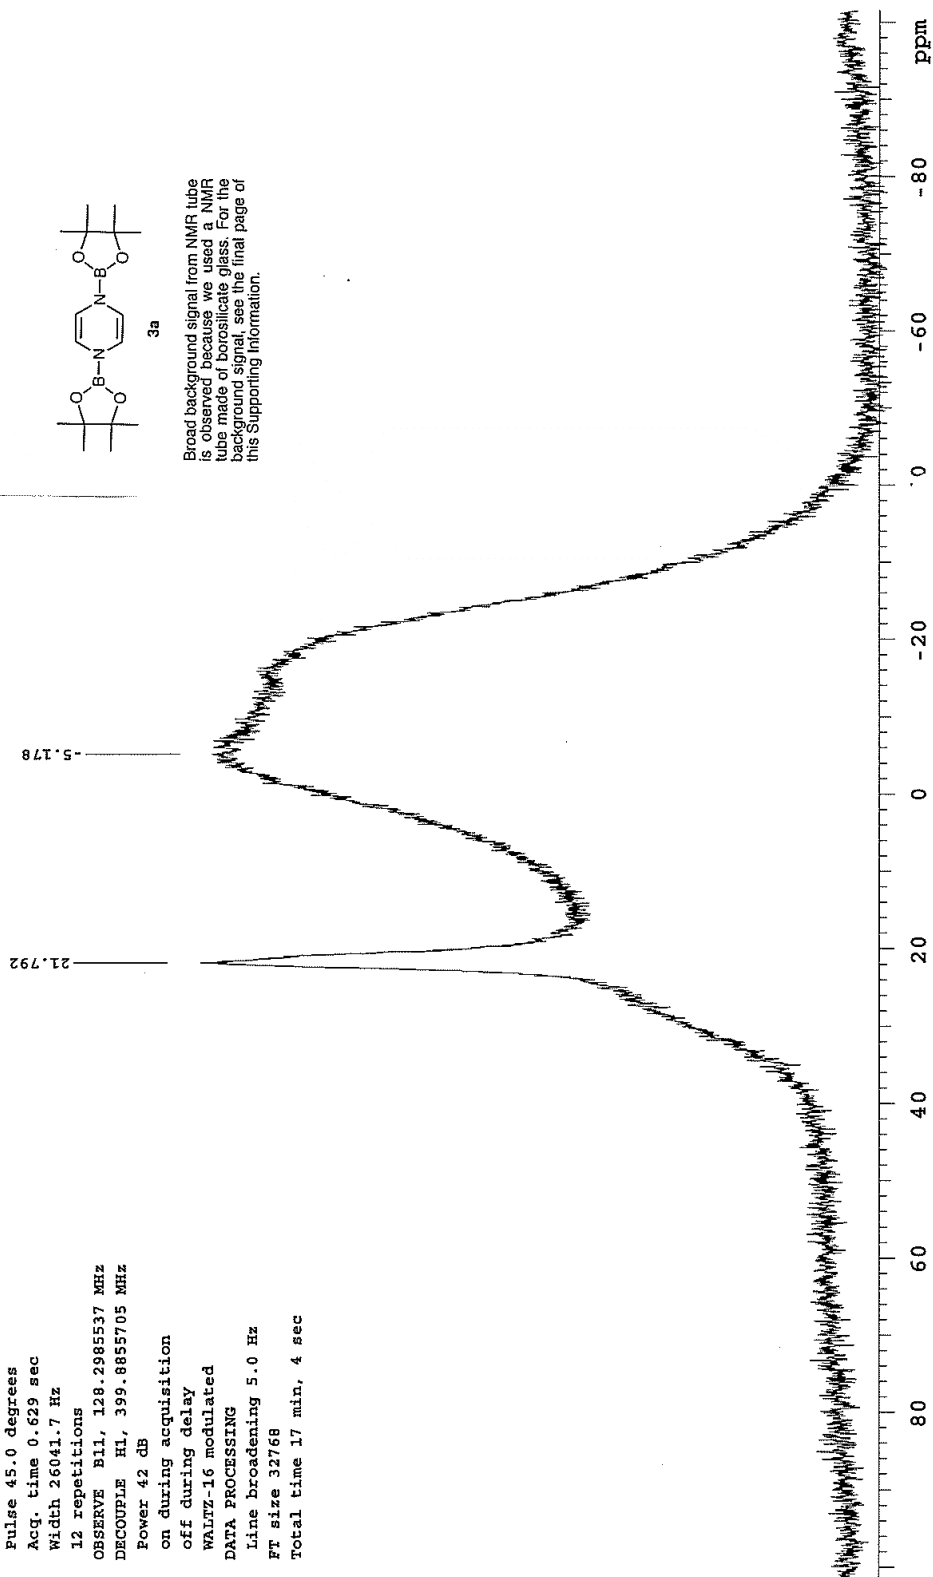

STANDARD PROTON PARAMETERS

File: home/vnmr1/vnmrsys/data/oshima/K03253-H-CDCl3.fid

Pulse sequence: s2pul

Solvent: cdcl3

Ambient temperature

Operator: vnmr1

File: K03253-H-CDCl3

VNMR5-400 "400MR-2nd"

Relax. delay 1.500 sec

Pulse 45.0 degrees

Acq. time 3.500 sec

Width 6410.3 Hz

8 repetitions

OBSERVE HL, 399.8835282 MHz

DATA PROCESSING

Line broadening 0.2 Hz

FT size 65536

Total time 10 min, 40 sec

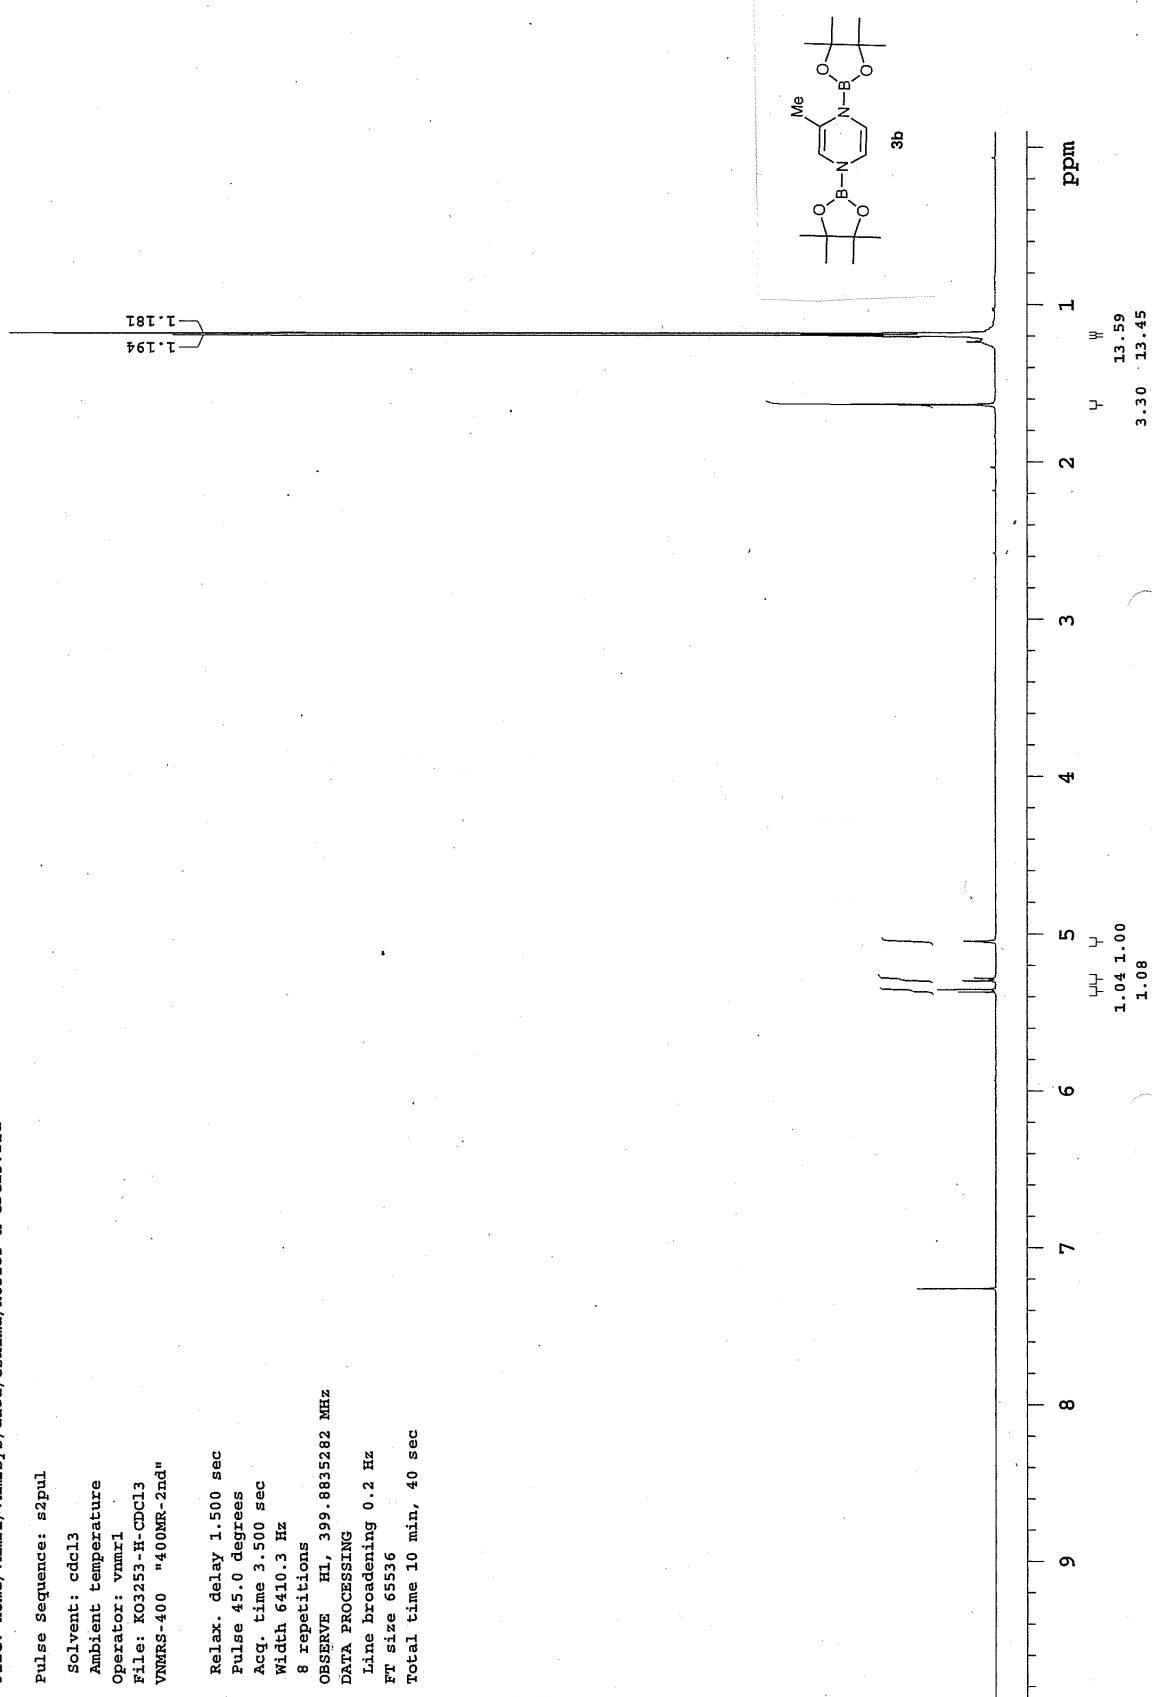

DFILE KO3253-BCM-CDCl3.ALS  
COMNT  
DATIM Sat Mar 03 00:00:43 20  
ORNUC 13C  
EXMOD SINGL  
OBPRO 125.65 MHz  
OBFIN 128449.88 Hz  
POINT 32768  
FREQU 28011.20 Hz  
SCANS 169  
ACQIM 1.1698 sec  
ED 2.0000 sec  
FWI 4.50 usec  
IRNUC 1H  
CTEMP 21.5 C  
SLVNT CDCl3  
EXREF 77.00 PPM  
BF -0.10 Hz  
RGAIN 33

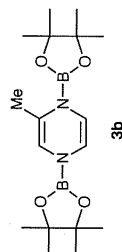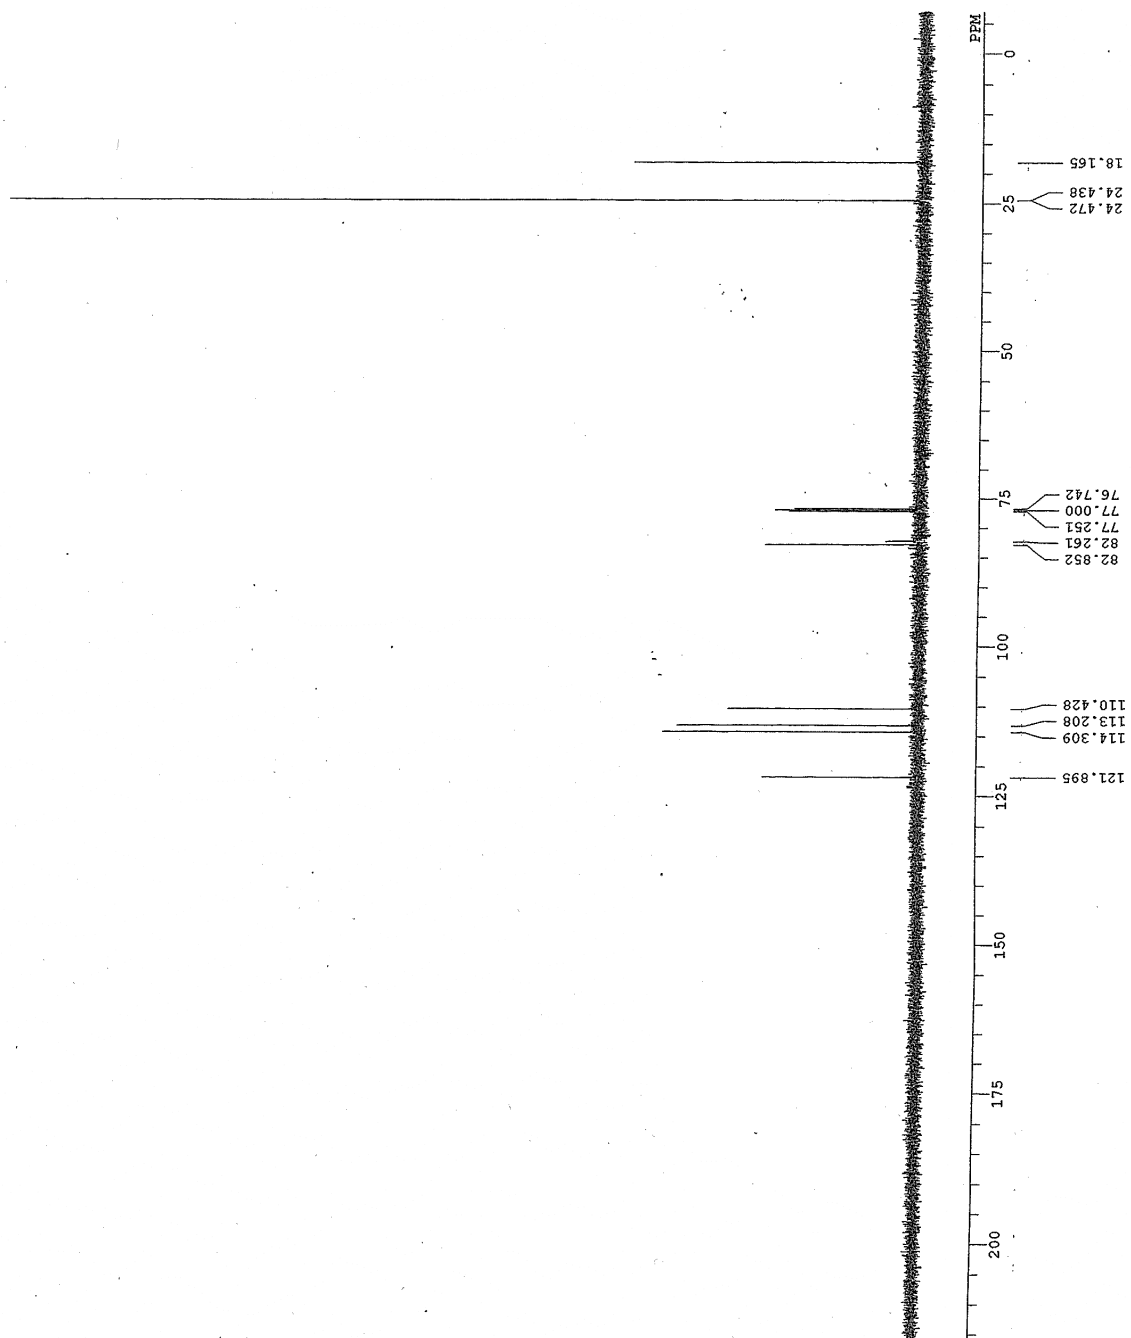

STANDARD CARBON PARAMETERS

File: home/vnmr1/vnmr1\data/oshima/KO3253-B-CDCl3.fid

Pulse Sequence: s2pul

Solvent: c6d6  
Ambient temperature  
Operator: vnmr1  
File: KO3253-B-CDCl3  
VNMR5-400 "400MR-2nd"

Relax. delay 1.371 sec  
Pulse 45.0 degrees  
Acq. time 0.629 sec  
Width 26041.7 Hz  
48 repetitions  
OBSERVE B11, 128.298537 MHz  
DECOUPLE H1, 399.885705 MHz  
Power 42 dB  
on during acquisition  
off during delay  
WALTZ-16 modulated  
DATA PROCESSING  
Line broadening 5.0 Hz  
FT size 32768  
Total time 17 min, 4 sec

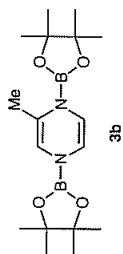

Broad background signal from NMR tube is observed because we used a NMR tube made of borosilicate glass. For the background signal, see the final page of this Supporting Information.

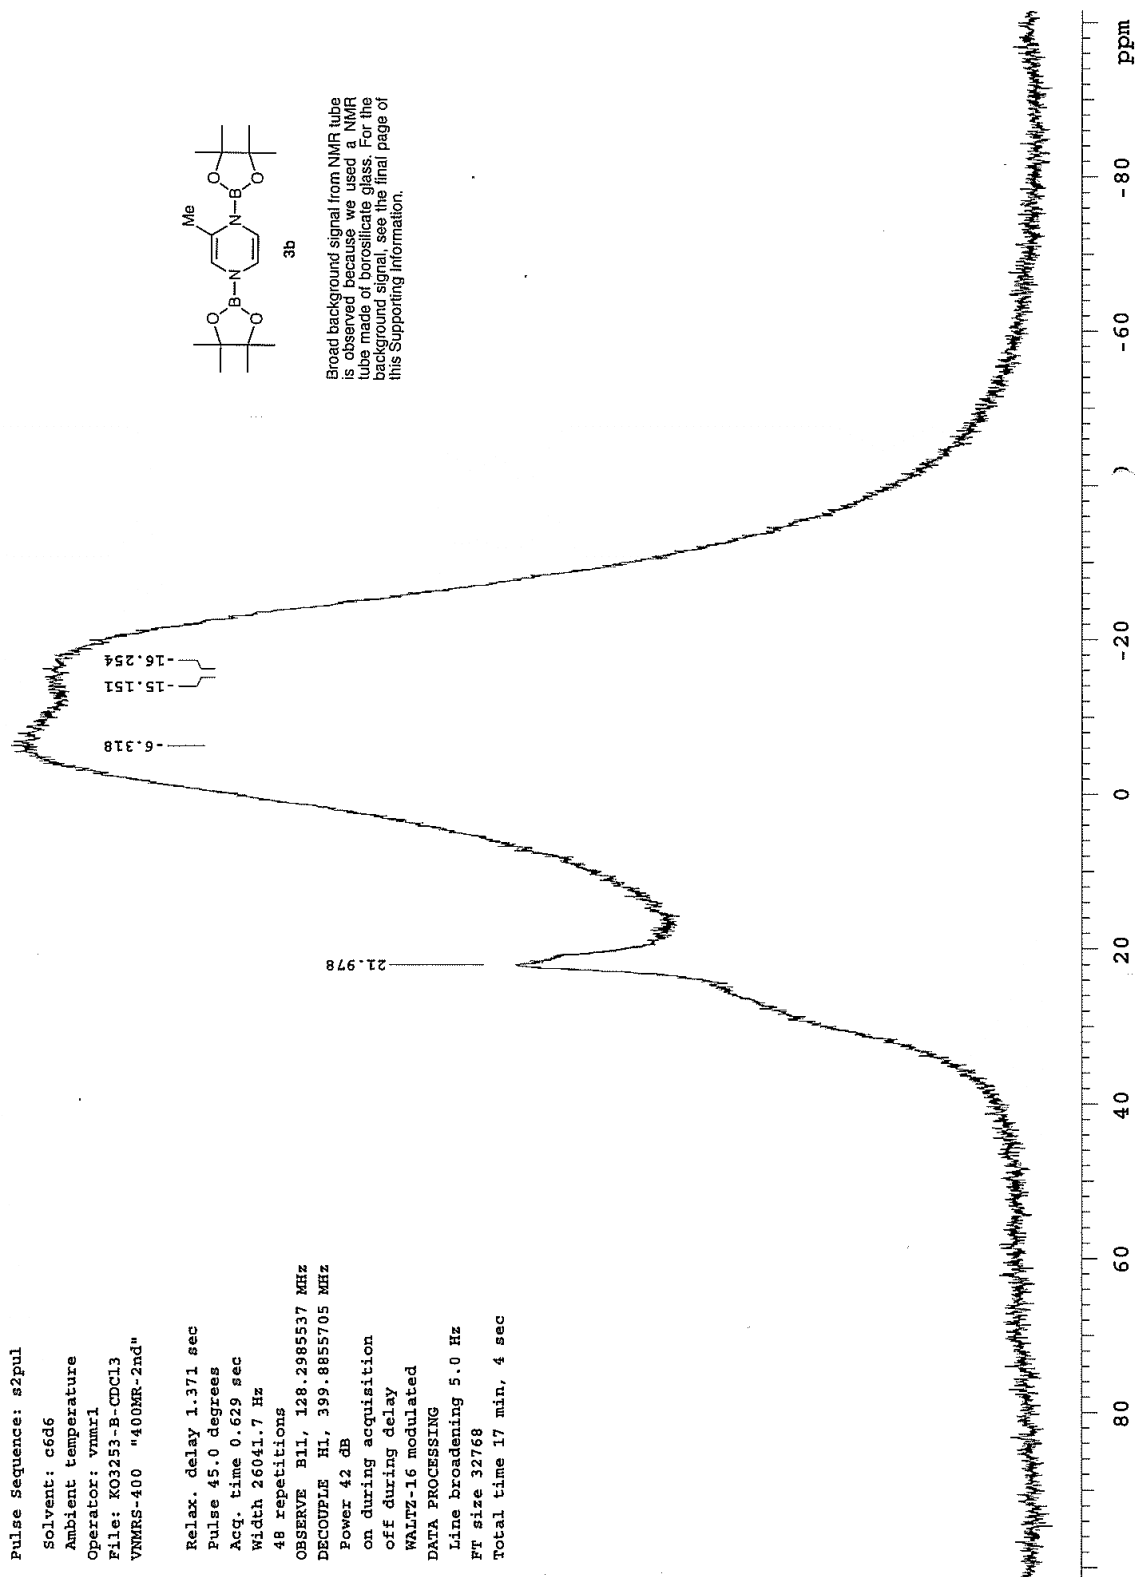

STANDARD PROTON PARAMETERS

File: home/vnmr1/vnmrsys/data/oshima/KO3272-H-re-CDCl3.fid

Pulse Sequence: s2pul

Solvent: cdcl3

Ambient temperature

Operator: vnmr1

File: KO3272-H-re-CDCl3

VNMR5-400 "400MR-2nd"

Relax. delay 1.500 sec

Pulse 45.0 degrees

Acq. time 3.500 sec

Width 6410.3 Hz

16 repetitions

OBSERVE H1, 399.8835280 MHz

DATA PROCESSING

Line broadening 0.2 Hz

FT size 65536

Total time 10 min, 40 sec

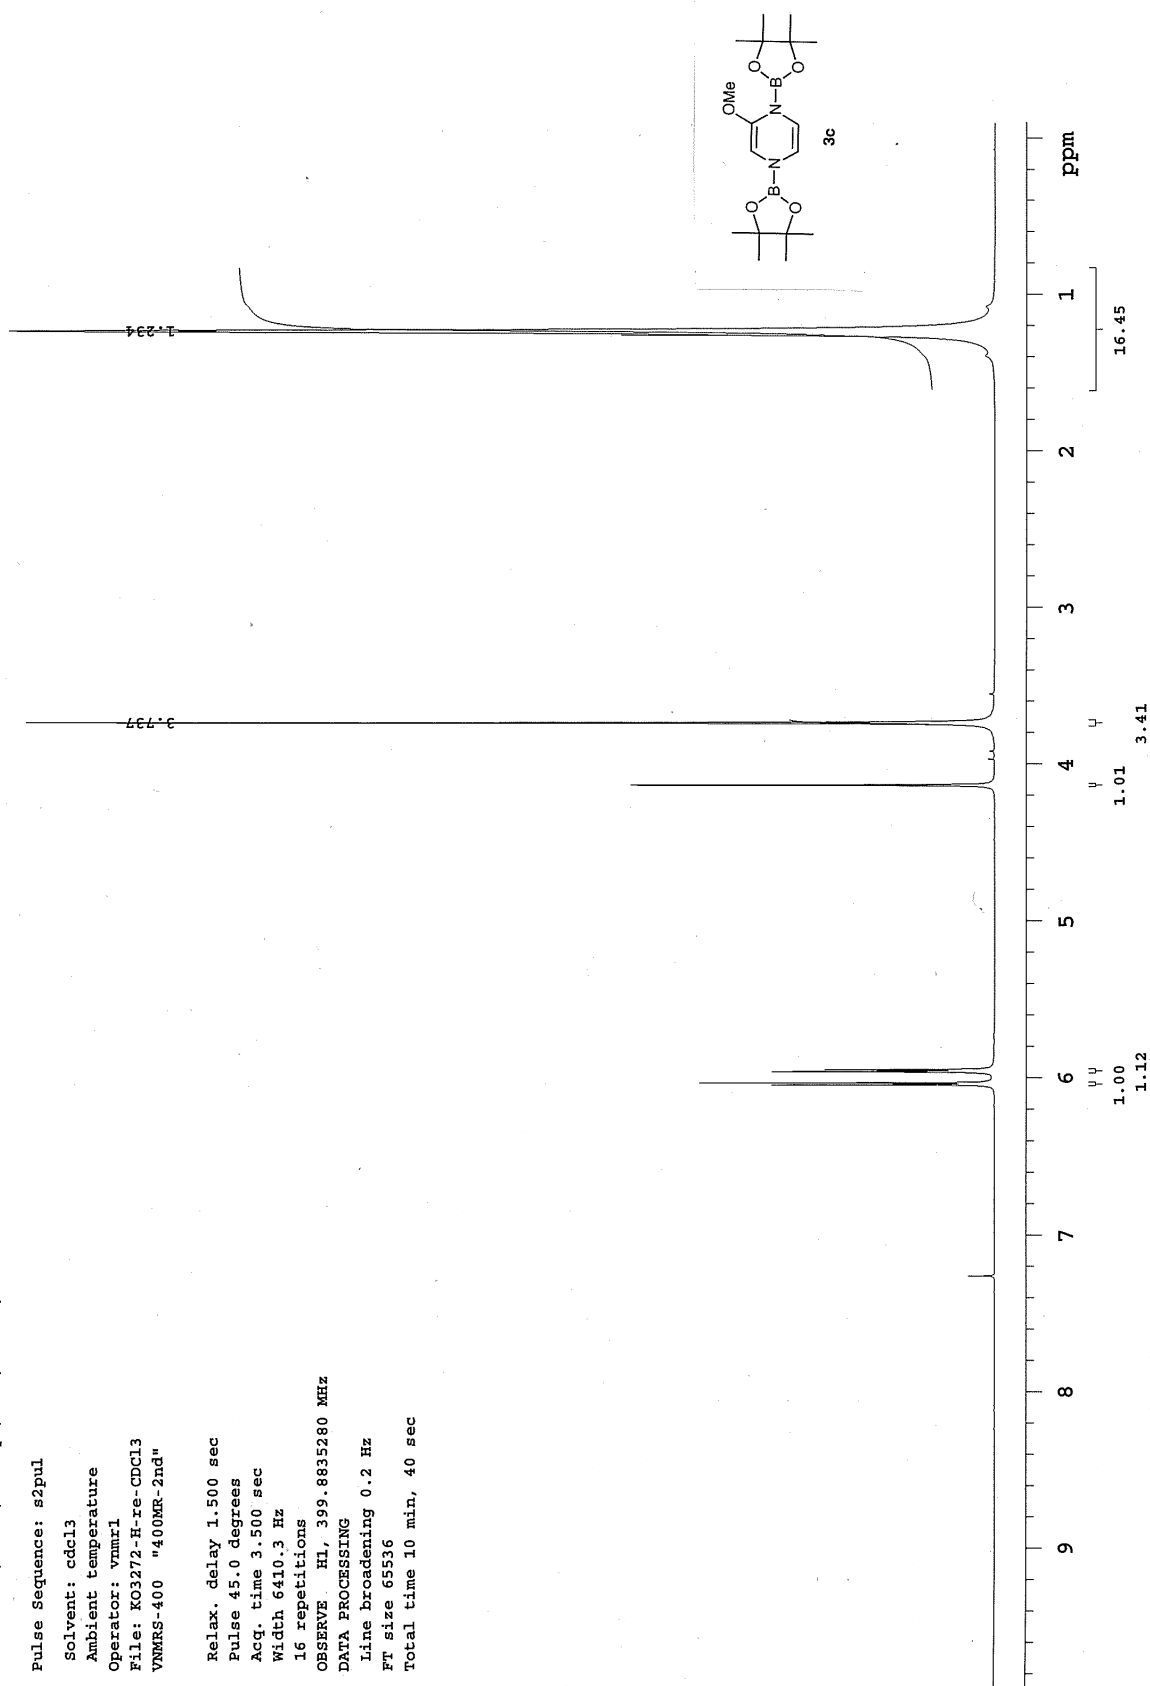

DFILE \_DEFAULT.ALS  
COMNT  
DATIM Sat Mar 03 03:05:43 20  
OBNUC 13C  
EXMOD SINGL  
OBPRO 125.85 MHz  
OBFIN 128449.48 Hz  
POINT 32768  
FREQU 28011.20 Hz  
SCANS 160  
ACQIM 1.1688 sec  
ED 2.0000 sec  
PWI 4.50 usec  
IRNUC 1H  
CTEMP 21.6 C  
SOLVT CDCl3  
EXREF 77.00 ppm  
BF -0.10 Hz  
RGAIN 33

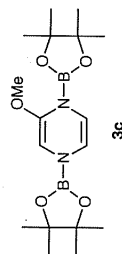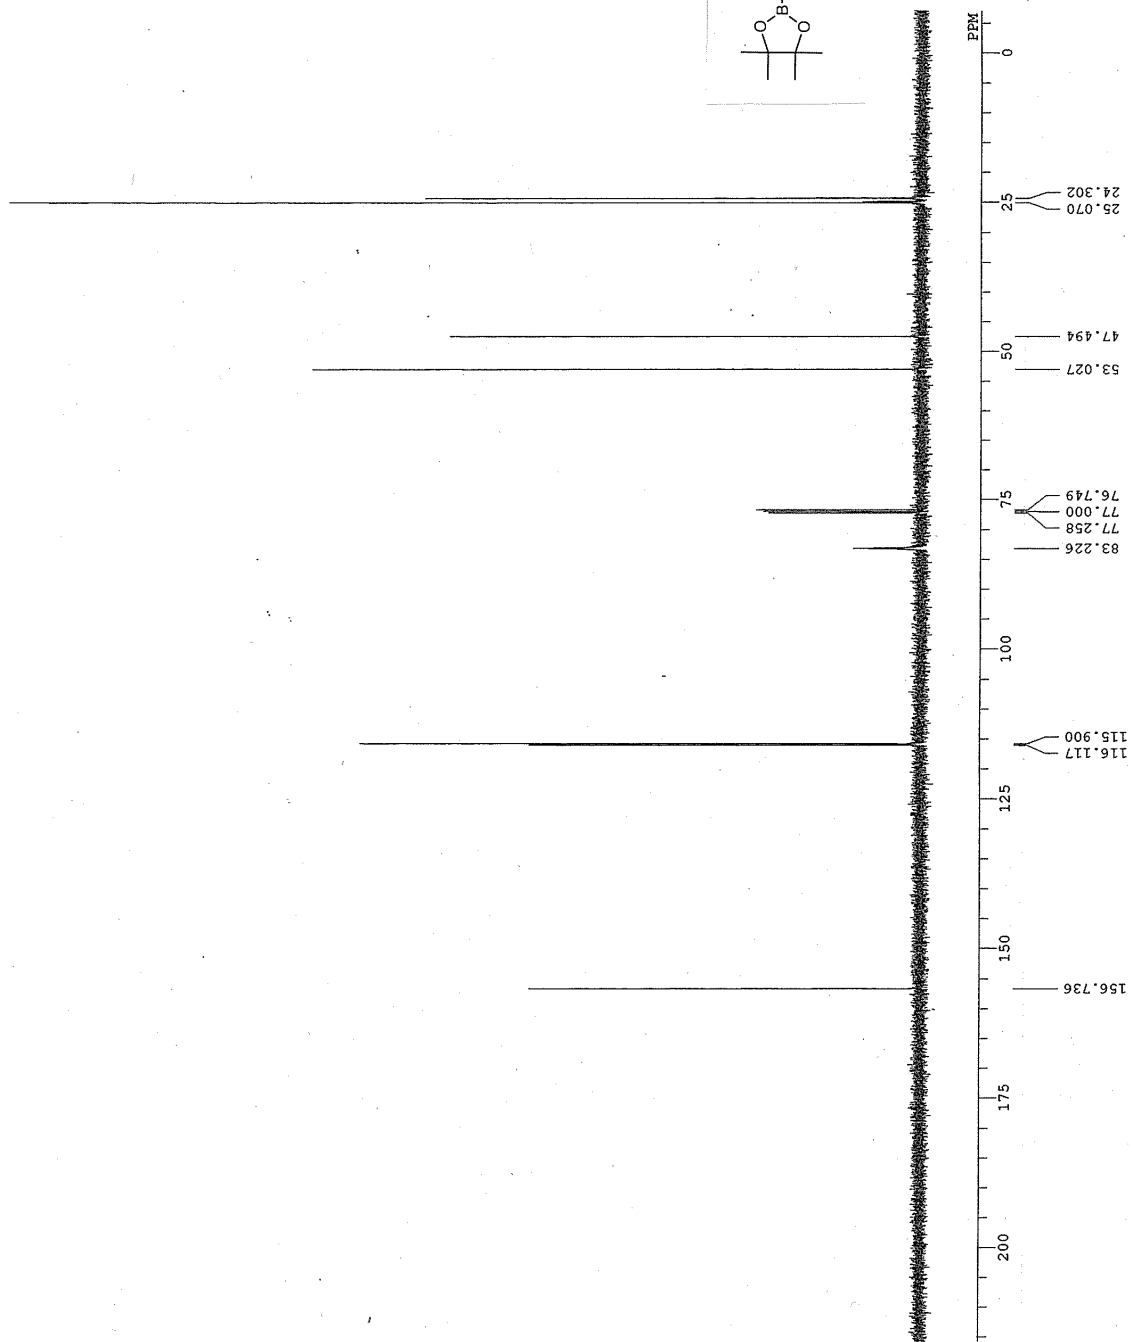

STANDARD CARBON PARAMETERS

File: home/vnmr1/vnmrSYS/data/oshima/KO3272-B-CDCl3.fid

Pulse Sequence: s2pul

Solvent: cdcl3  
Ambient temperature  
Operator: vnmr1  
File: KO3272-B-CDCl3  
VNMR5-400 "400MR-2nd"

Relax. delay 1.371 sec  
Pulse 45.0 degrees  
Acq. time 0.629 sec  
Width 26041.7 Hz  
16 repetitions  
OBSERVE B11, 128.2985581 MHz  
DECOUPLE H1, 399.8855346 MHz

Power 42 dB  
on during acquisition  
off during delay  
WALTZ-16 modulated  
DATA PROCESSING  
Line broadening 5.0 Hz  
FT size 32768  
Total time 17 min, 4 sec

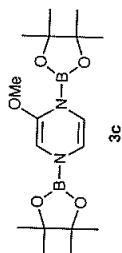

Broad background signal from NMR tube is observed because we used a NMR tube made of borosilicate glass. For the background signal, see the final page of this Supporting Information.

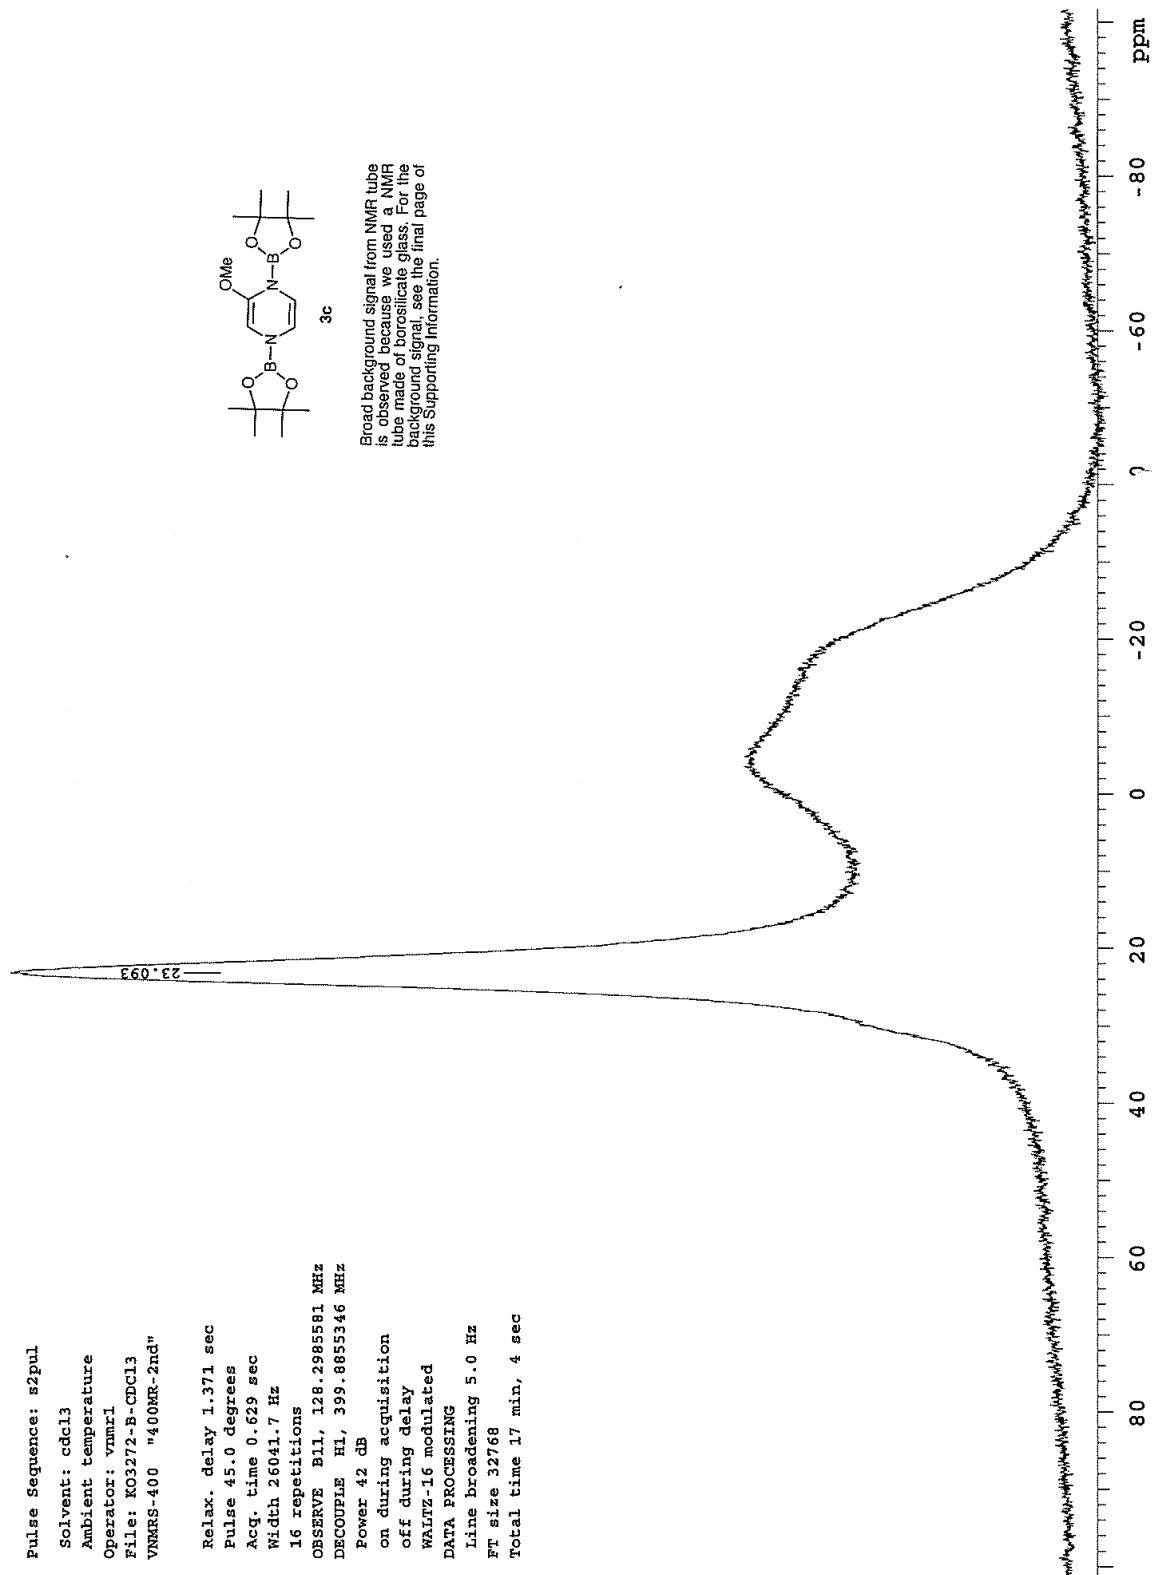



STANDARD PROTON PARAMETERS

File: home/vnmr1/vnmrsys/data/oshima/K03278-H-CDCl3.fid

Pulse Sequence: s2pul

Solvent: cdcl3  
Ambient temperature  
Operator: vnmr1  
File: K03278-H-CDCl3  
VNMRS-400 "400MF-2nd"

Relax. delay 1.500 sec  
Pulse 45.0 degrees  
Acq. time 3.500 sec  
Width 6410.3 Hz  
8 repetitions

OBSERVE H1, 399.8835282 MHz  
DATA PROCESSING  
Line broadening 0.2 Hz  
FT size 65536  
Total time 10 min, 40 sec

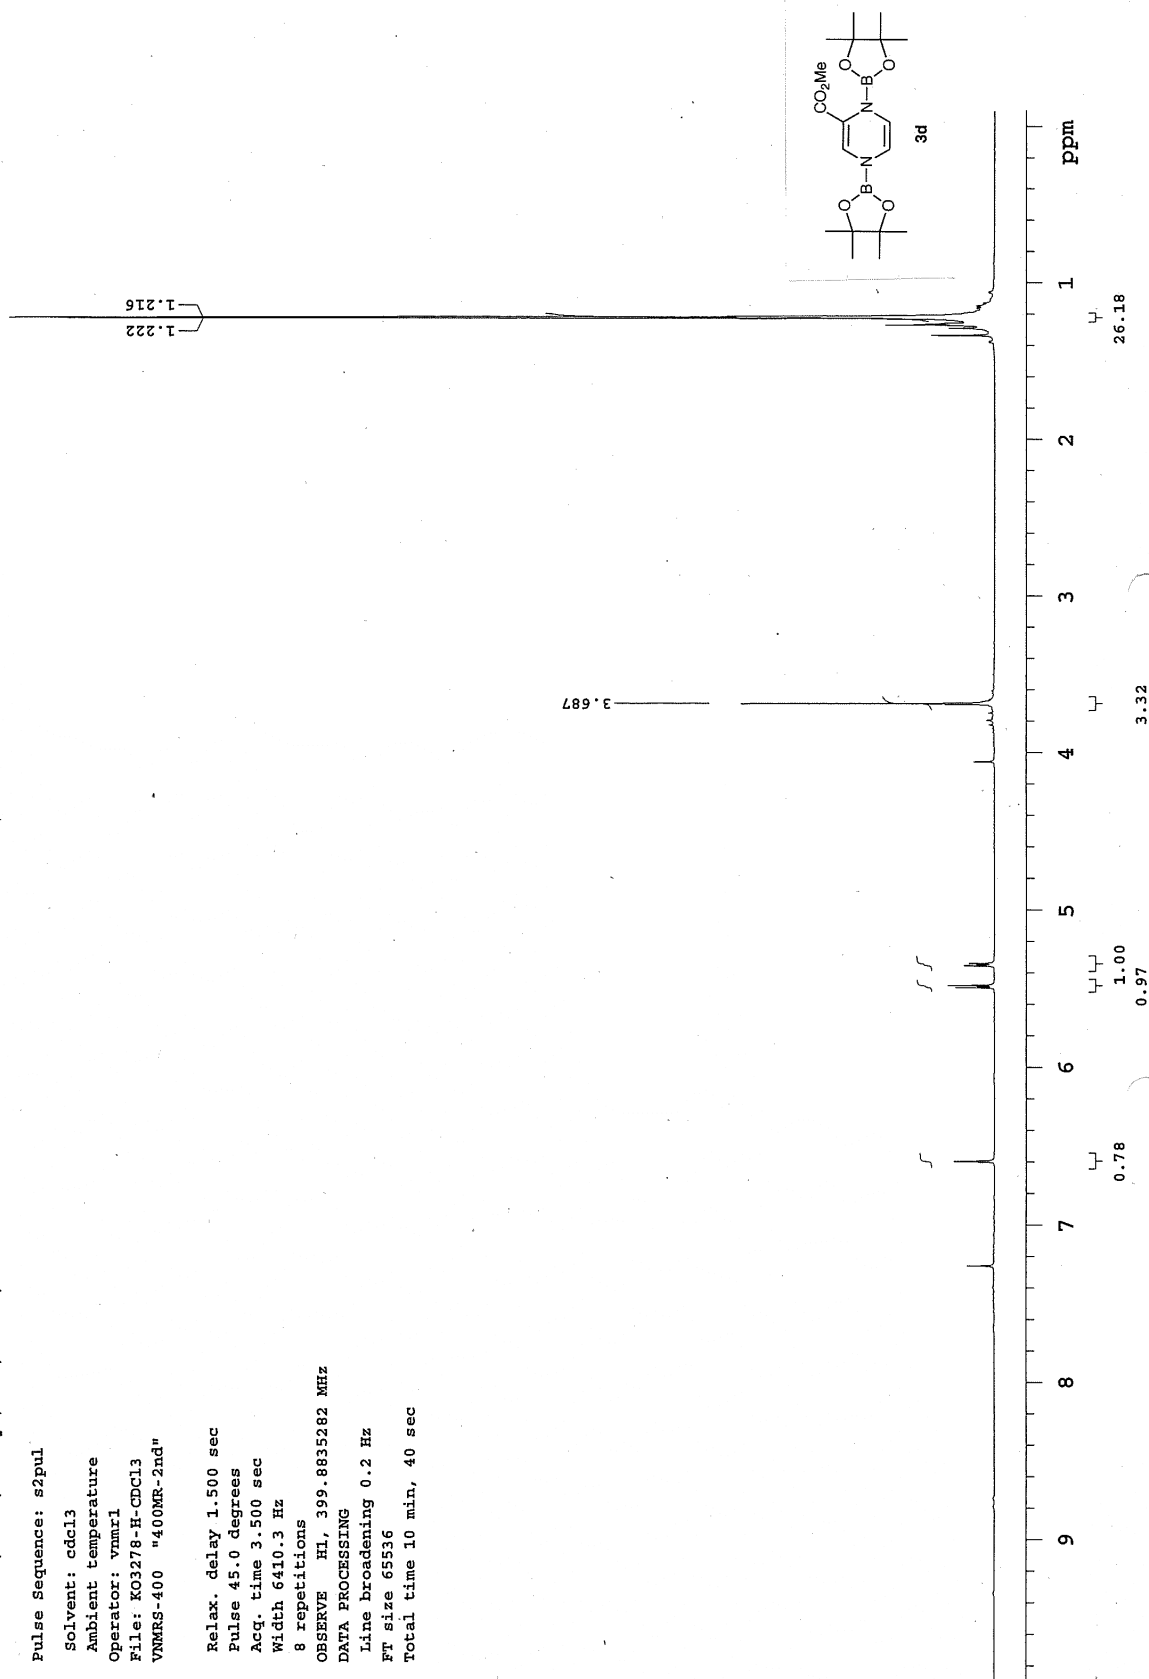

DFILE K03278-ECM-CDC13.ALS  
CONNT Wed Mar 07 17:22:51 20  
DAYM 13C  
OBNUC 13C  
EXMOD SINGL  
OBFREQ 125.65 MHz  
OBFIN 128449.48 Hz  
POINT 32768  
FREQU 28011.20 Hz  
SCANS 85  
ACQTM 1.1698 sec  
PD 2.0000 sec  
PWL 4.50 usec  
IRNUC 1H  
CTEMP 21.9 c  
SIVNT CDCL3  
EXREF 77.00 PPM  
BF 0.43 Hz  
RGAIN 33

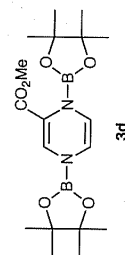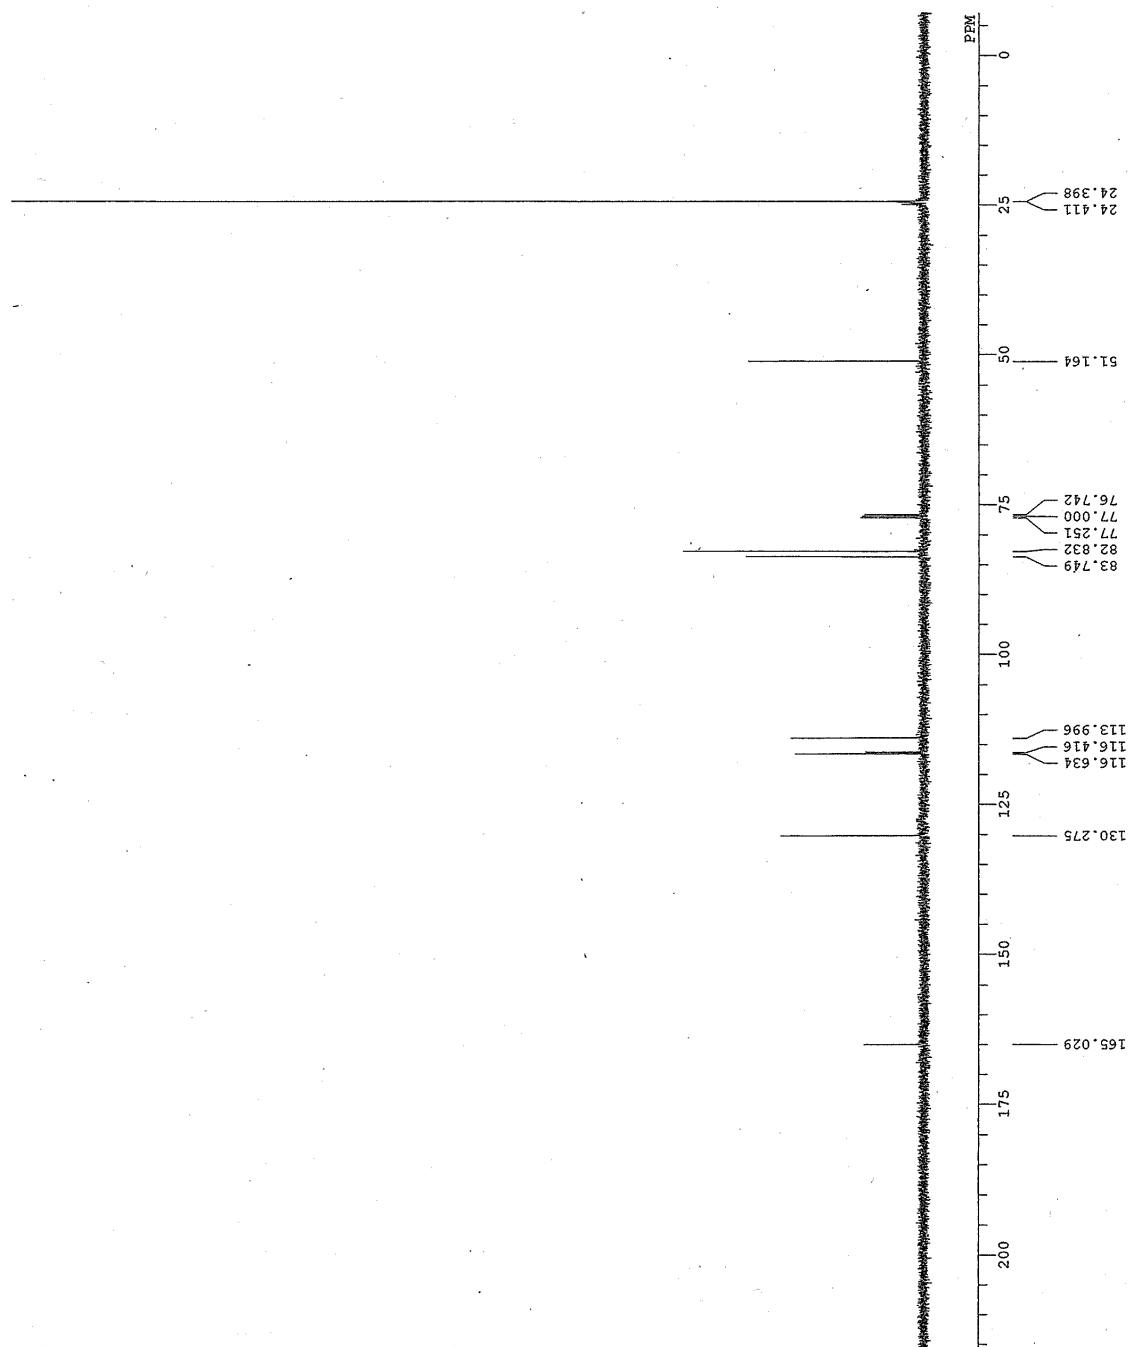

STANDARD CARBON PARAMETERS

File: home/vnmr1/vnmrSYS/data/oshima/K03278-B-CDCl3.fid

Pulse Sequence: s2pul

Solvent: cdcl3  
Ambient temperature  
Operator: vnmr1  
File: K03278-B-CDCl3  
VNMR5-400 "400MR-2nd"

Relax. delay 1.371 sec  
Pulse 45.0 degrees  
Acq. time 0.629 sec  
Width 26041.7 Hz  
16 repetitions

OBSERVE B11, 128.2985565 MHz  
DECOUPLE H1, 399.8855346 MHz

Power 42 dB  
on during acquisition  
off during delay

WALTZ-16 modulated

DATA PROCESSING

Line broadening 5.0 Hz  
FT size 32768  
Total time 17 min, 4 sec

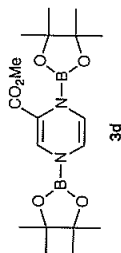

Broad background signal from NMR tube is observed because we used a NMR tube made of borosilicate glass. For the background signal, see the final page of this Supporting Information.

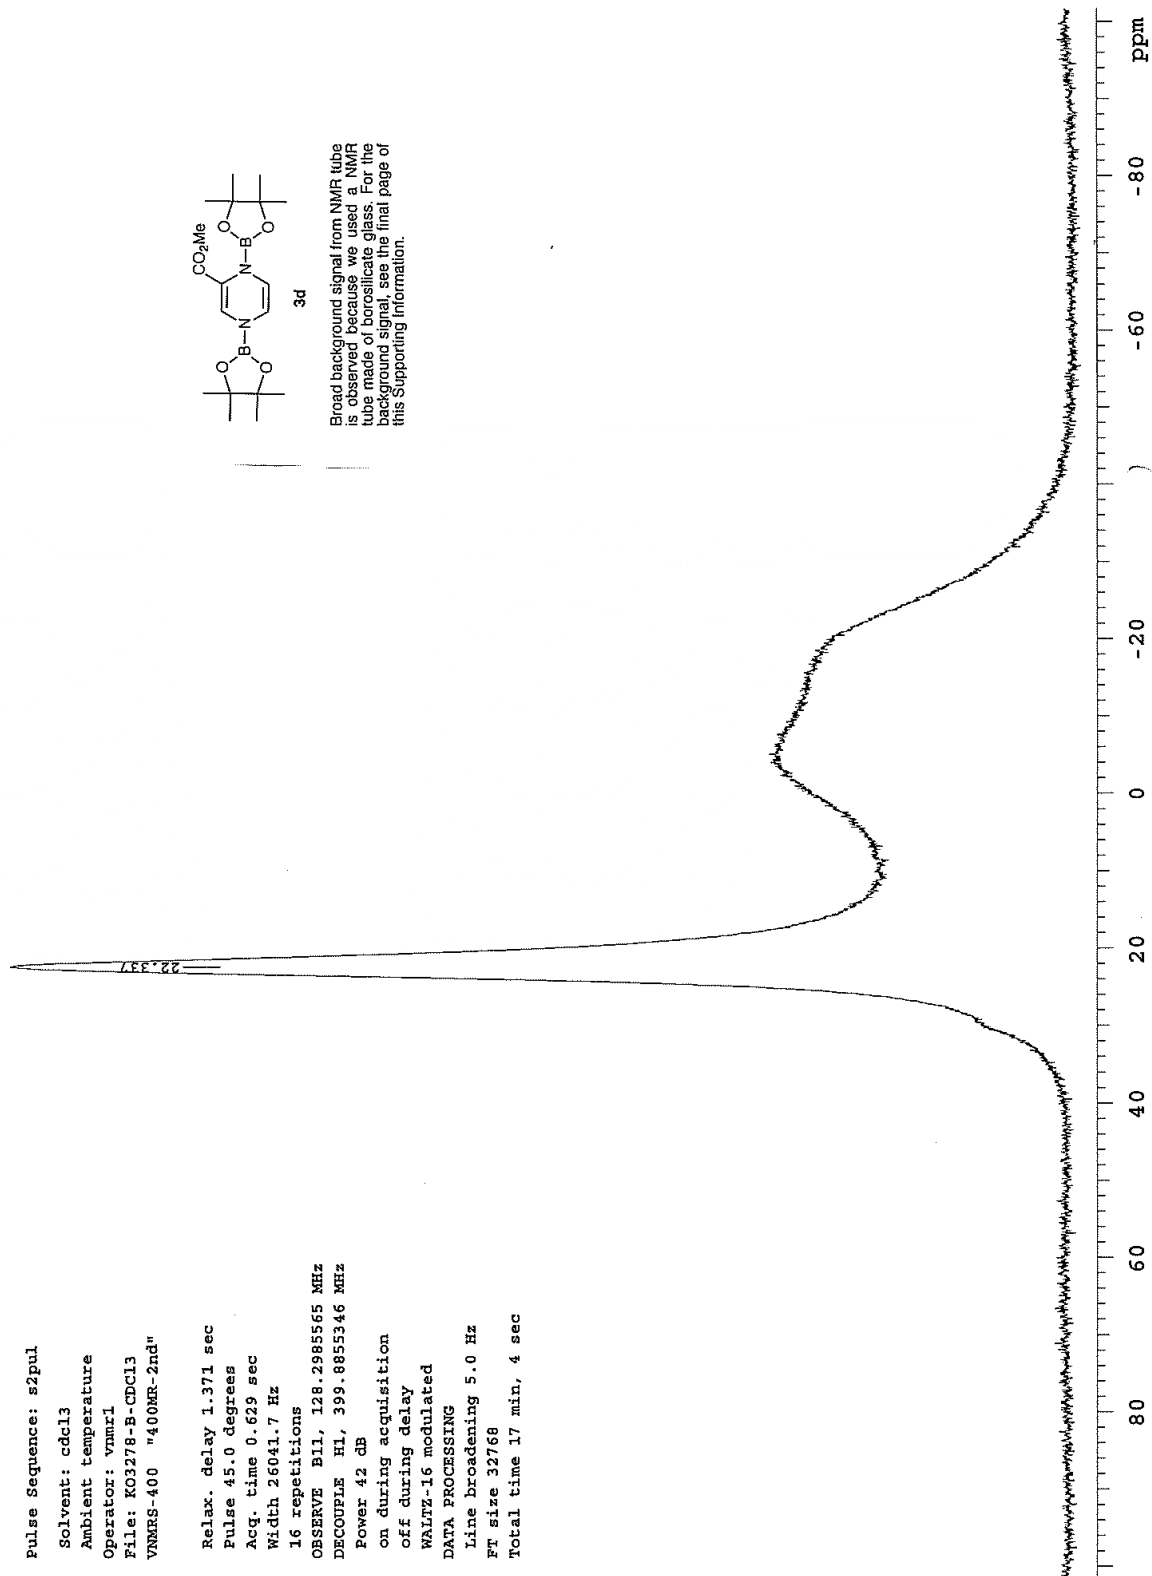

STANDARD PROTON PARAMETERS

File: home/vnmr1/vnmrSYS/data/oshima/KO3281-H-CDCl3.fid

Pulse Sequence: s2pul

Solvent: cdcl3  
Ambient temperature  
Operator: vnmr1  
File: KO3281-H-CDCl3  
VNMRS-400 "400MR-2nd"

Relax. delay 1.500 sec  
Pulse 45.0 degrees  
Acq. time 3.500 sec  
Width 6410.3 Hz  
4 repetitions  
OBSERVE H1, 399.8635282 MHz  
DATA PROCESSING  
Line broadening 0.2 Hz  
FT size 65536  
Total time 10 min, 40 sec

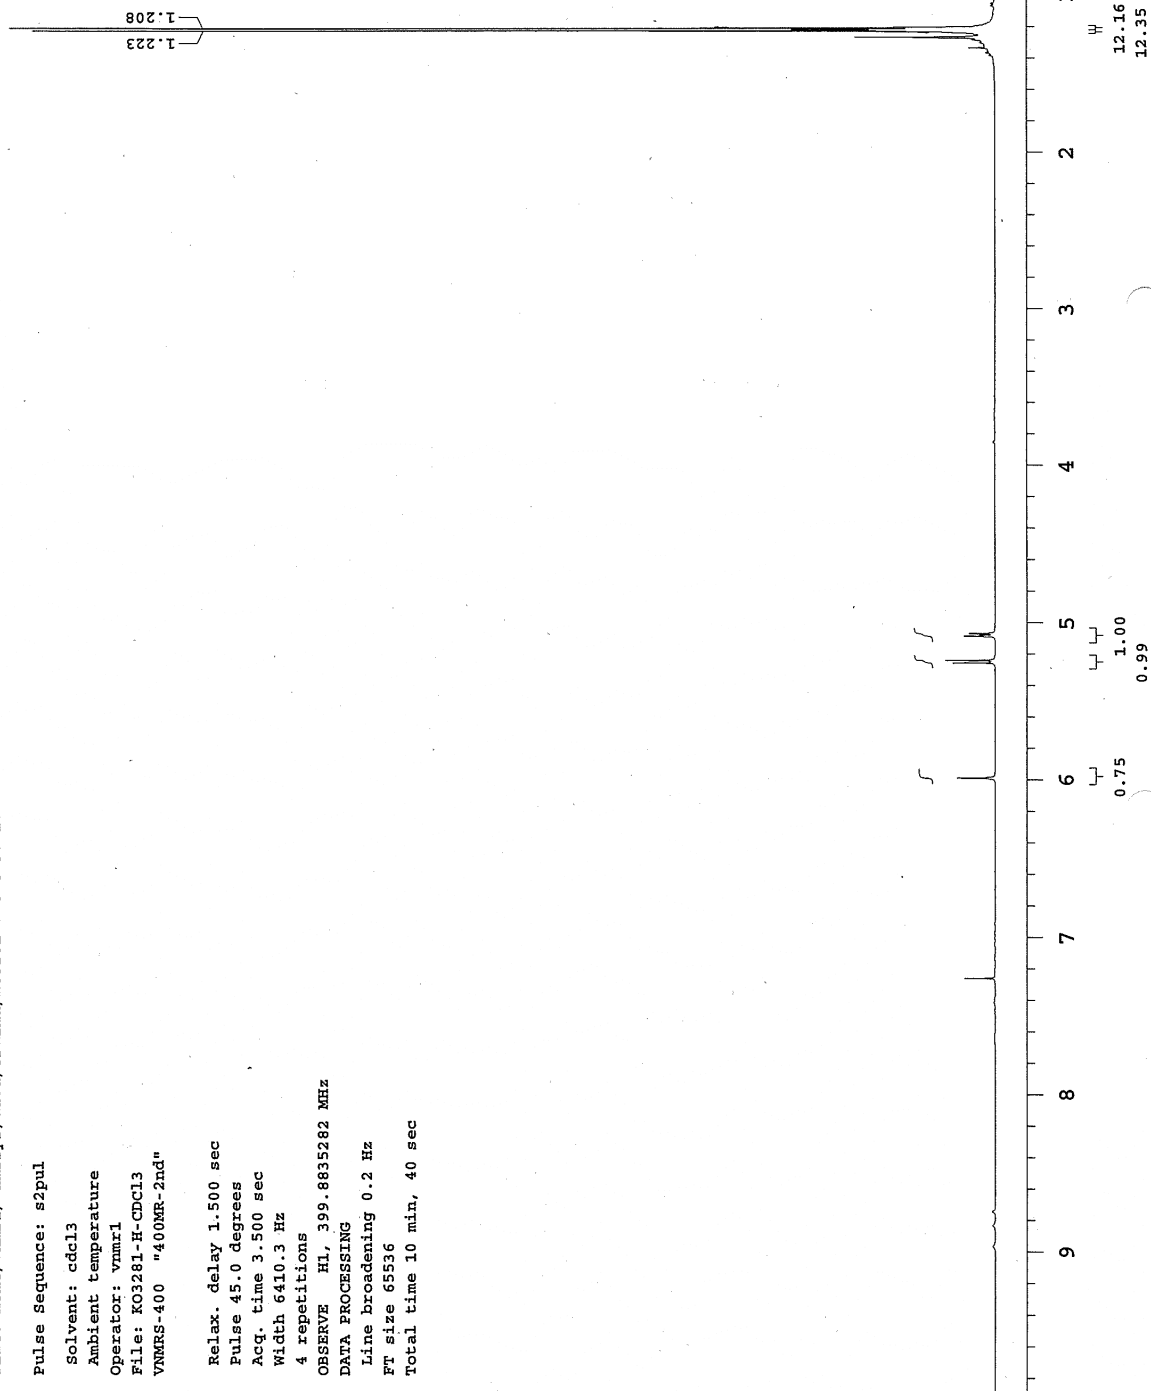

DFILE K03281-C4-CDCl3.als  
COMNT  
DATIM Tue Mar 06 17:06:55 20  
ORNUC 13C  
EXMOD SINGL  
OBFOC 125.65 MHz  
OBFIN 128443.48 Hz  
FOINT 32768  
FREQU 28011.20 Hz  
SCANS 20  
ACQTM 1.1698 sec  
PD 2.0000 sec  
FWI 4.50 usec  
IRNUC 1H  
CTEMP 22.0 C  
SLVNT CDCl3  
EXREF 77.00 ppm  
BF 0.49 Hz  
RGAIN 35

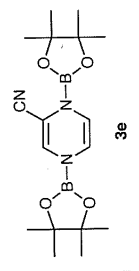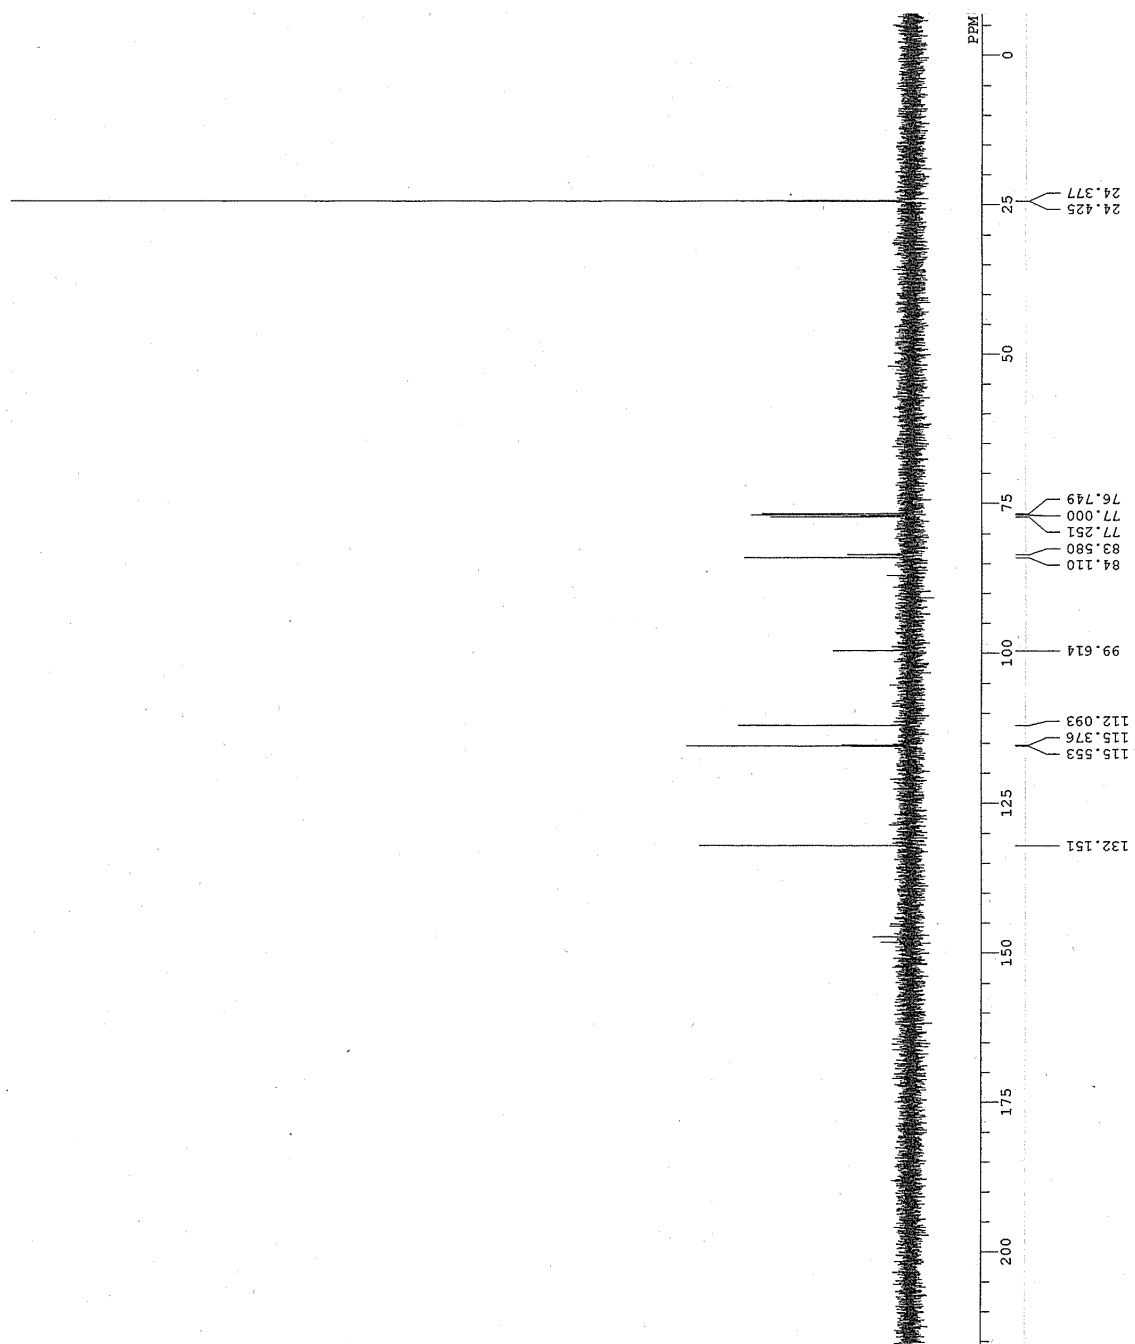

STANDARD CARBON PARAMETERS

File: home/vnmr1/vnmrSYS/data/oshima/KO3281-B-CDCl3.fid

Pulse Sequence: s2pul

Solvent: cdcl3  
Ambient temperature  
Operator: vnmr1  
File: KO3281-B-CDCl3  
VNMRS-400 "400MR-2nd"

Relax. delay 1.371 sec  
Pulse 45.0 degrees  
Acq. time 0.629 sec  
Width 26041.7 Hz  
12 repetitions  
OBSERVE B11, 128.2985533 MHz  
DECOUPLE H1, 399.8855346 MHz  
Power 42 dB  
on during acquisition  
off during delay  
WALTZ-16 modulated  
DATA PROCESSING  
Line broadening 5.0 Hz  
FT size 32768  
Total time 17 min, 4 sec

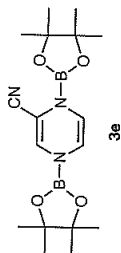

Broad background signal from NMR tube is observed because we used a NMR tube made of borosilicate glass. For the background signal, see the final page of this Supporting Information.

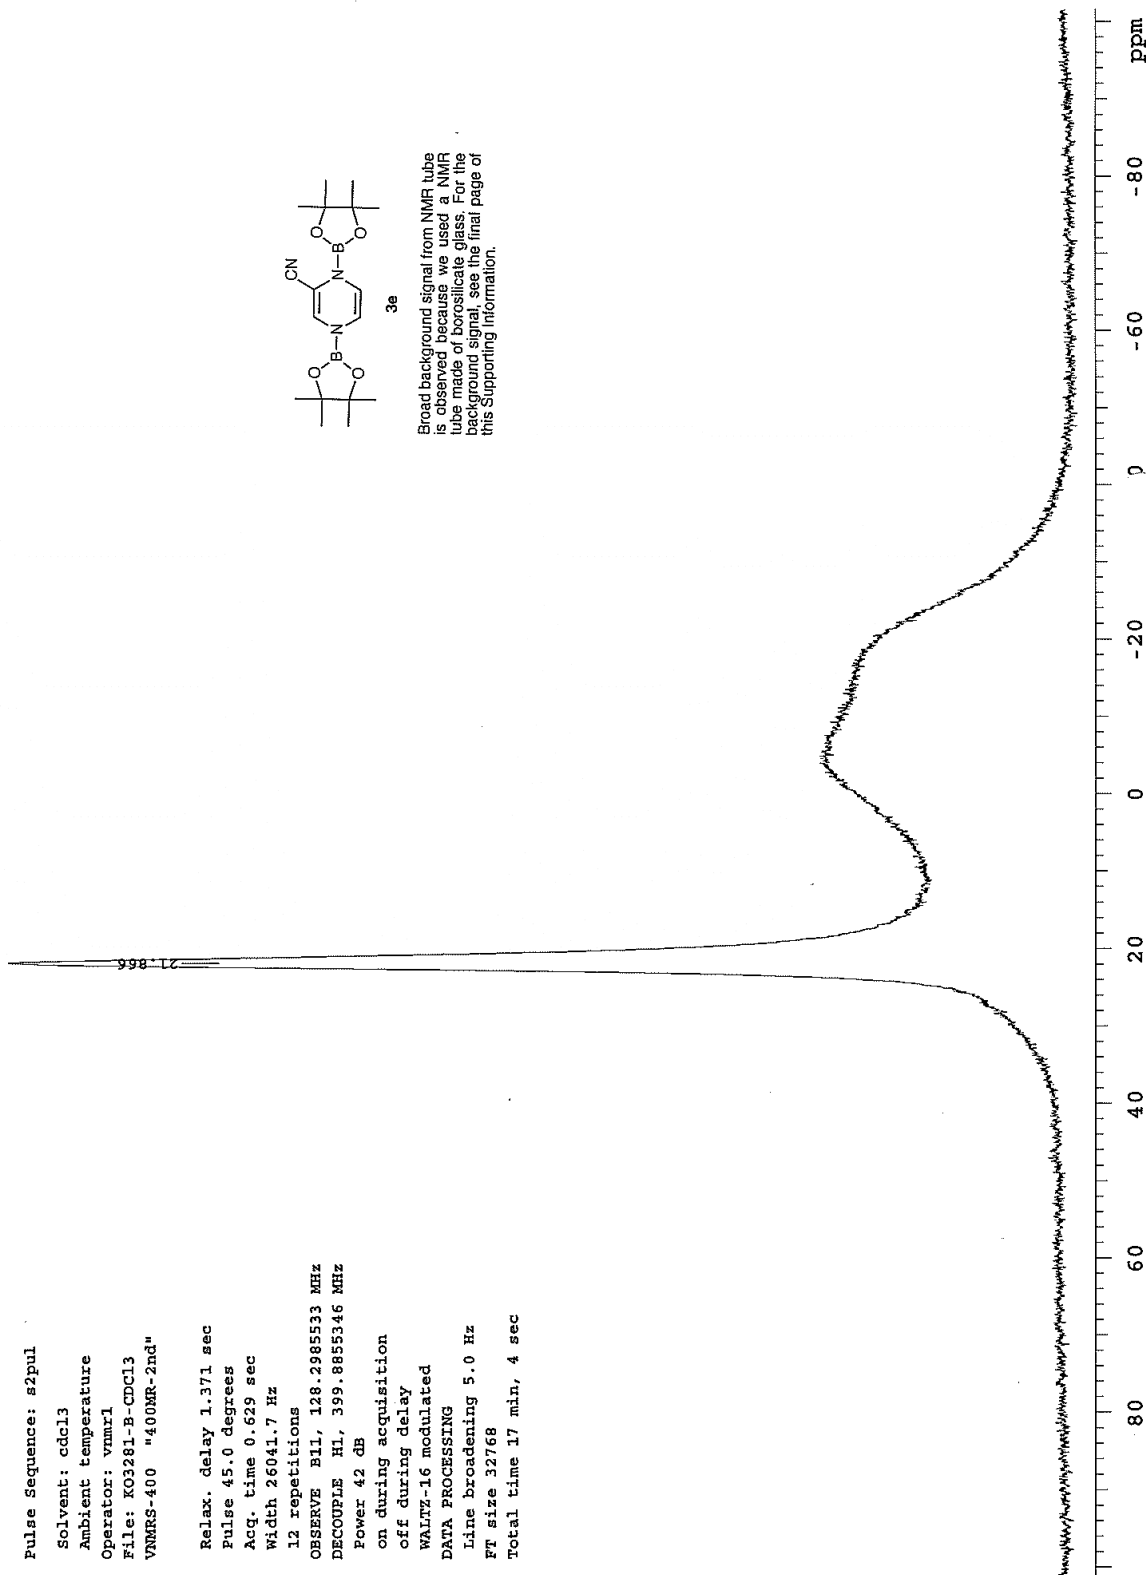

STANDARD PROTON PARAMETERS

File: home/vnmr1/vnmrsys/data/oshima/KO3254-H-C6D6.fid

Pulse Sequence: s2pul

Solvent: c6d6

Ambient temperature

Operator: vnmr1

File: KO3254-H-C6D6

VNMRS-400 "400MR-2nd"

Relax. delay 1.500 sec

Pulse 45.0 degrees

Acq. time 3.500 sec

Width 6410.3 Hz

12 repetitions

OBSERVE H1, 399.8835512 MHz

DATA PROCESSING

Line broadening 0.2 Hz

FT size 65536

Total time 10 min, 40 sec

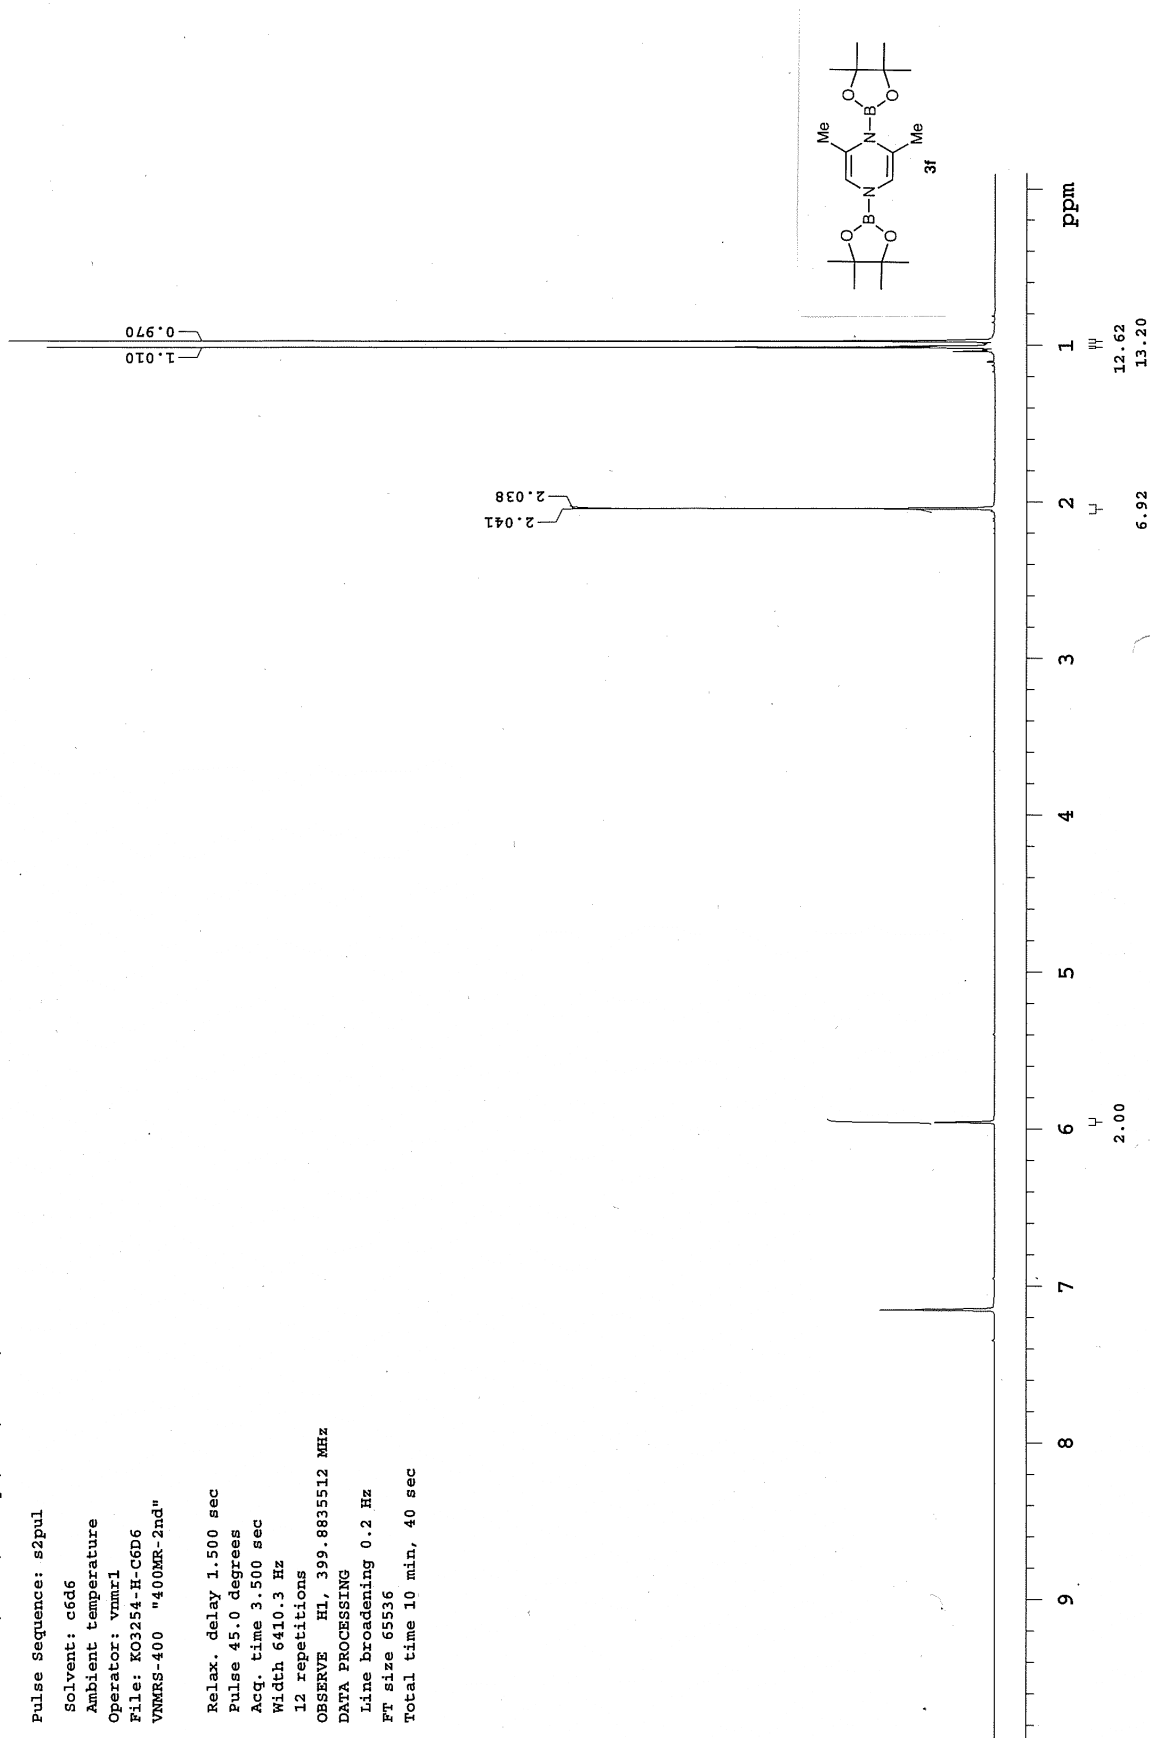

DFILE \_DEFAULT.ALS  
COMNT  
DATIM Sat Mar 03 00:19:58 20  
OBNUC 13C  
EXMOD SINGL  
OBFRQ 125.65 MHz  
OBFIN 128449.48 Hz  
POINT 32768  
FREOU 28011.20 Hz  
SCANS 1.1688 sec  
ACQTM 2.0000 sec  
PUL 4.50 usec  
IRNUC 1H  
CTEMP 21.2 c  
SLVNT C6D6  
EXREF 128.00 PPM  
BF -0.10 Hz  
RGAIN 32

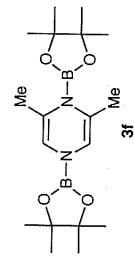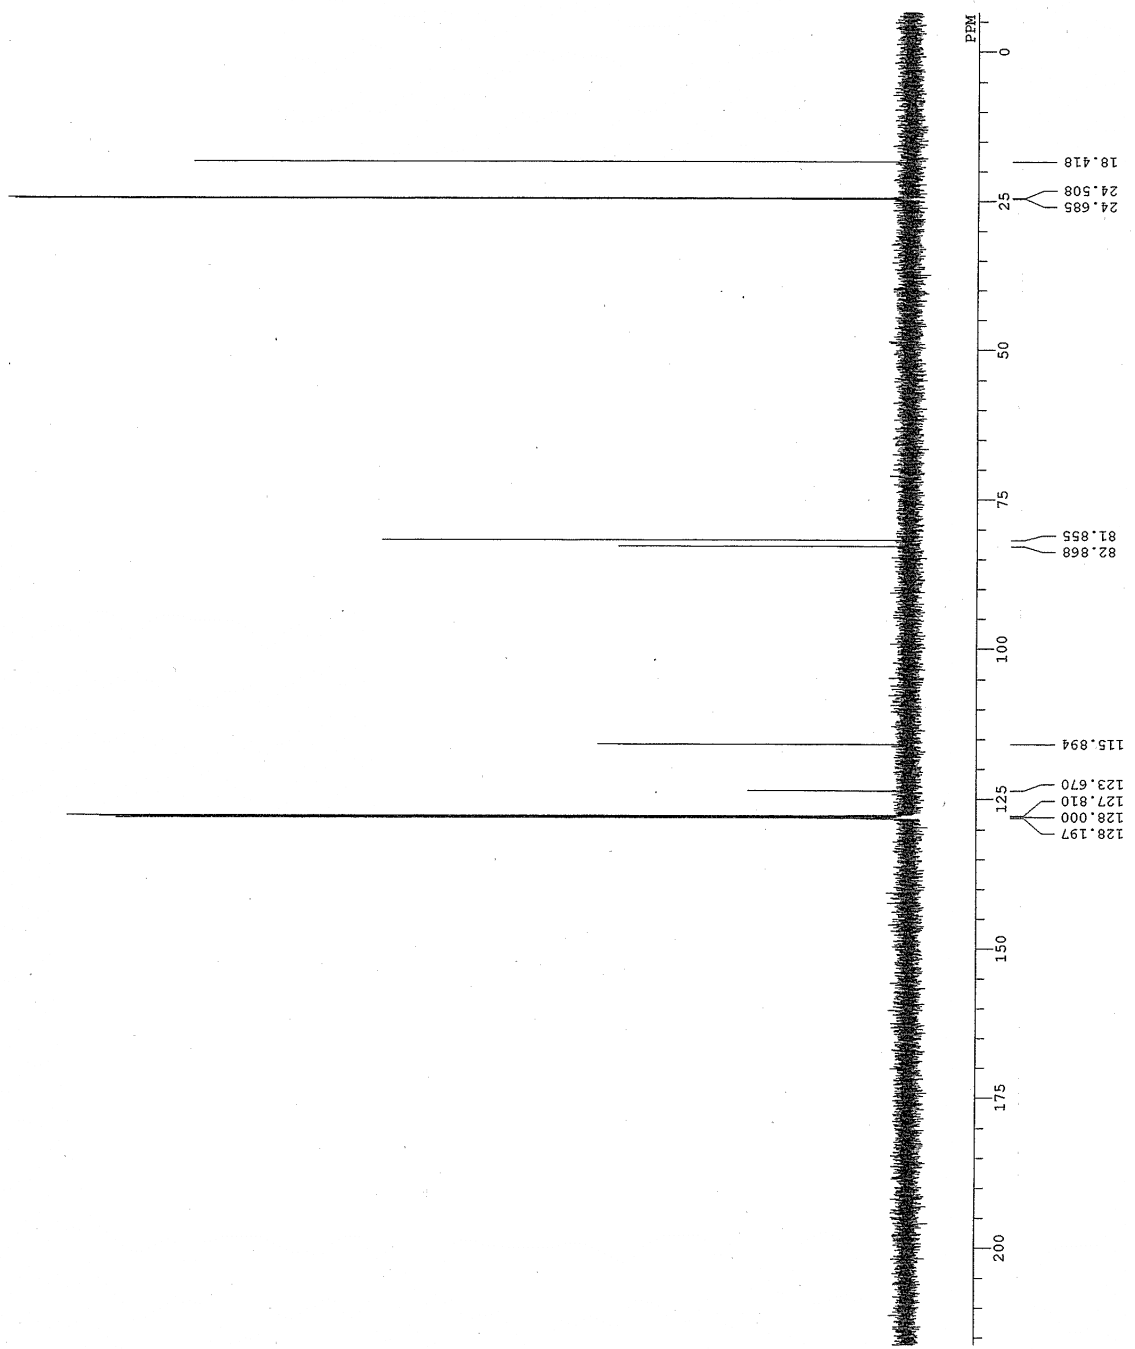



STANDARD CARBON PARAMETERS

File: home/vnmr1/vnmrSYS/data/oshima/K03254-B-C6D6.fid

Pulse Sequence: s2pul

Solvent: c6d6  
Ambient temperature  
Operator: vnmr1  
File: K03254-B-C6D6  
VNMRS-400 "400MR-2nd"

Relax. delay 1.371 sec  
Pulse 45.0 degrees  
Acq. time 0.629 sec  
Width 26041.7 Hz  
16 repetitions  
OBSERVE B11, 128.2985760 MHz  
DECOUPLE H1, 399.8855705 MHz  
Power 42 dB  
on during acquisition  
off during delay  
WALTZ-16 modulated  
DATA PROCESSING  
Line broadening 5.0 Hz  
Ft size 32768  
Total time 17 min, 4 sec

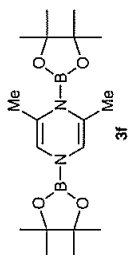

Broad background signal from NMR tube is observed because we used a NMR tube made of borosilicate glass. For the background signal, see the final page of this Supporting Information.

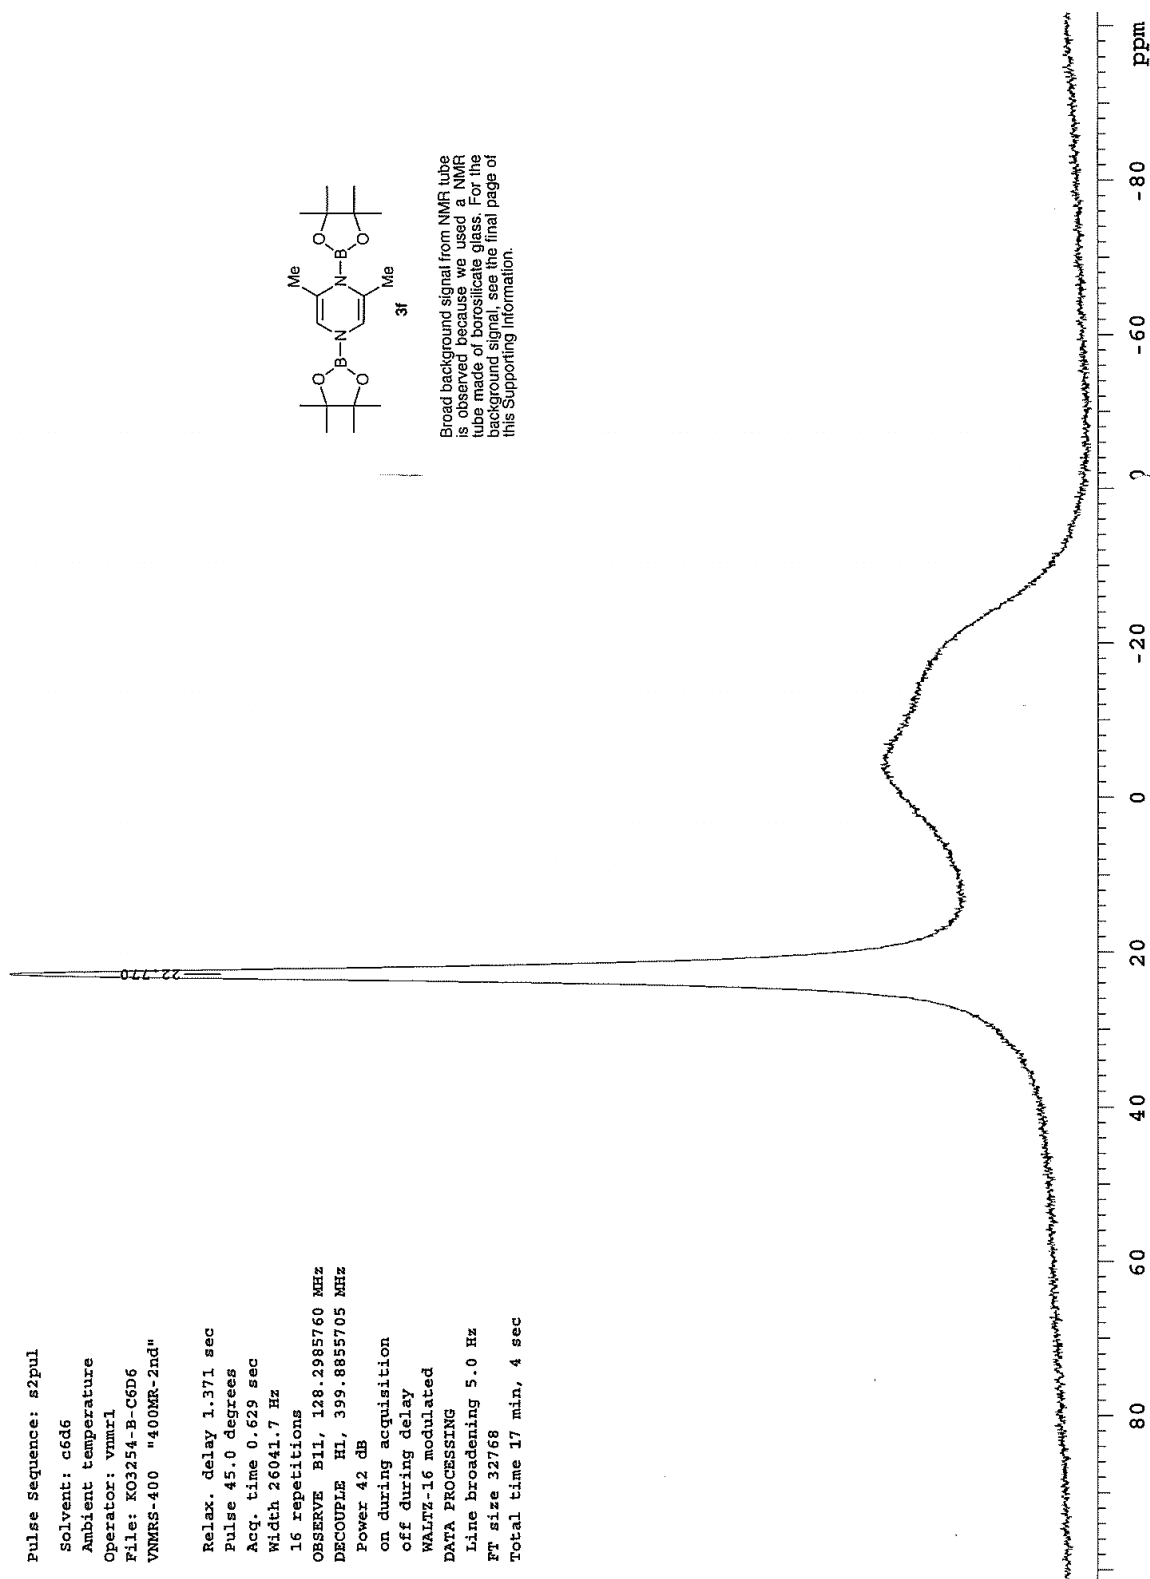

STANDARD PROTON PARAMETERS

File: home/vnmr1/vnmrSYS/data/oshima/K03296-H-CDCl3.fid

Pulse Sequence: s2pul

Solvent: cdcl3  
Ambient temperature  
Operator: vnmr1  
File: K03296-H-CDCl3  
VNMRS-400 "400MR-2nd"

Relax. delay 1.500 sec  
Pulse 45.0 degrees  
Acq. time 3.500 sec  
Width 6410.3 Hz  
8 repetitions

OBSERVE H1, 399.8835282 MHz

DATA PROCESSING

Line broadening 0.2 Hz  
FT size 65536  
Total time 10 min, 40 sec

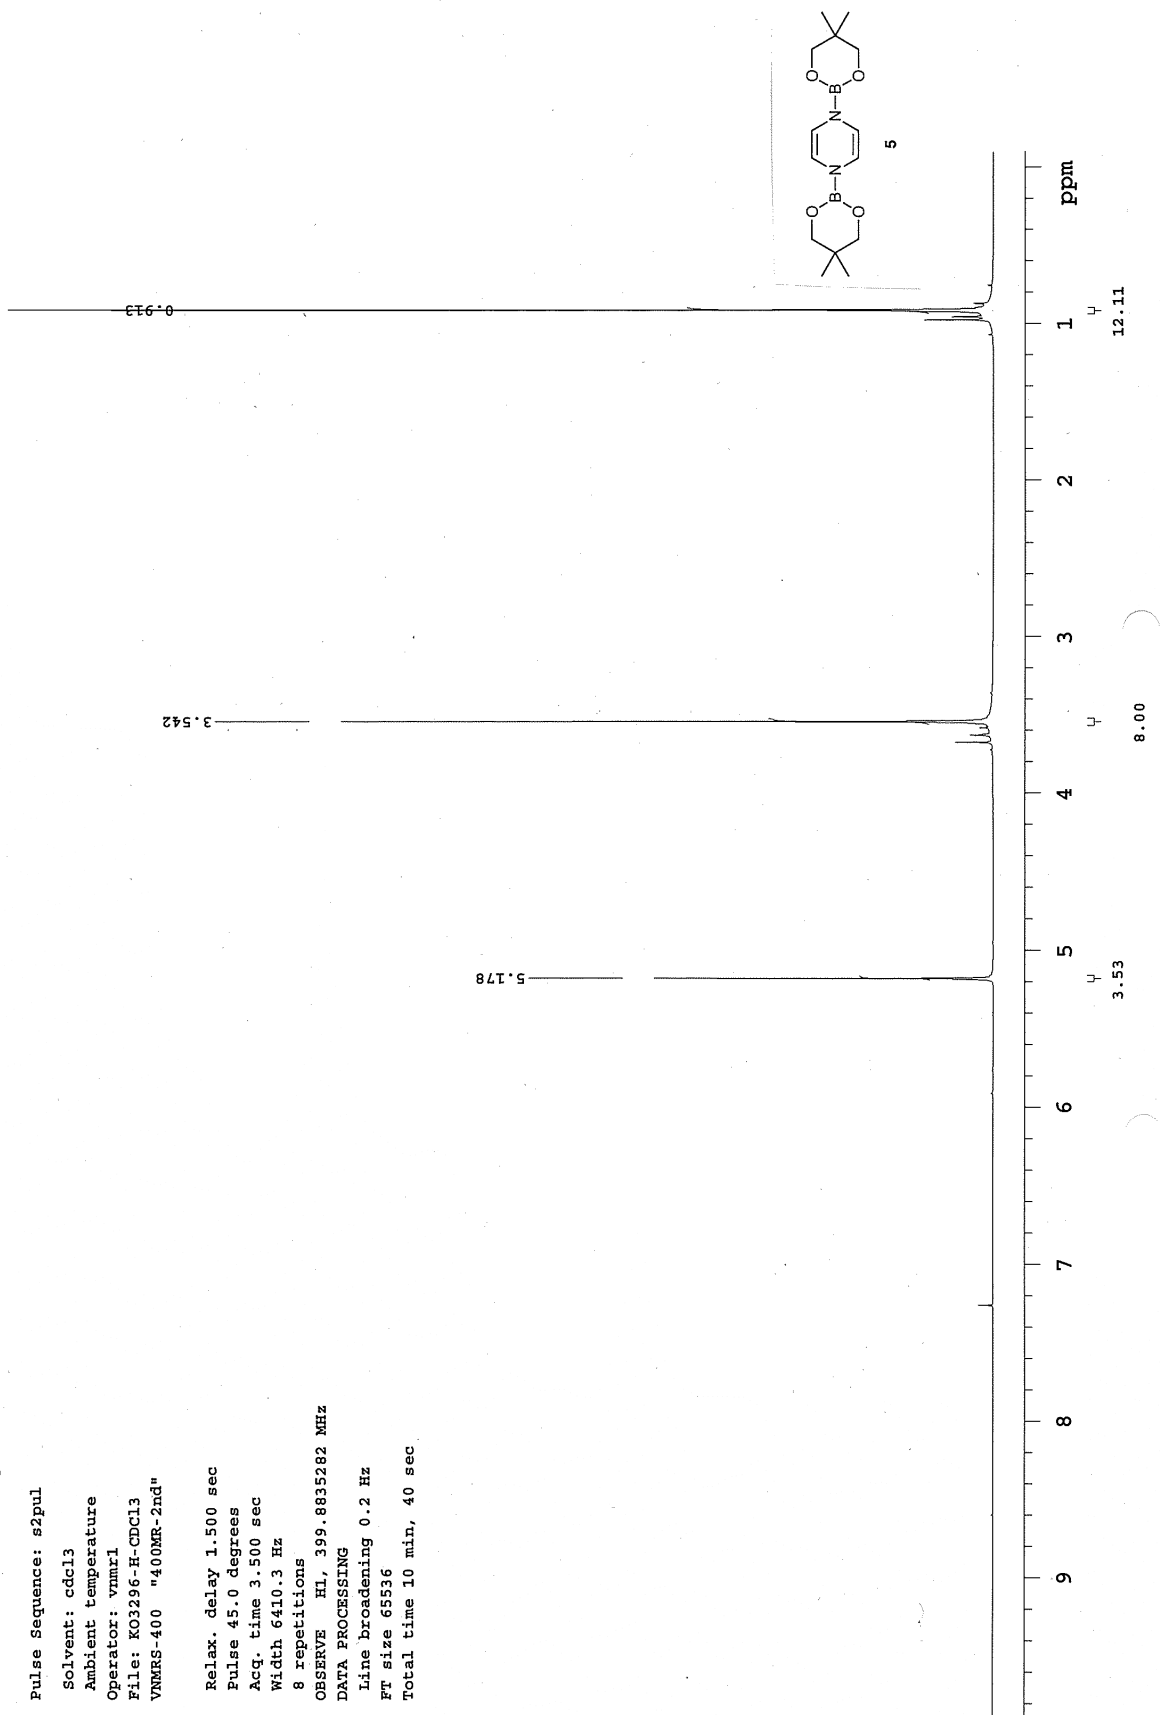

DETAILS\_DEFAULT.ALS  
CONNT 15 Mar 16 14:06:13 2012  
NAME 15  
ORIG F1  
EXPOD SINGL  
SOLVENT CDCl3  
PULPROG zgpg30  
AQTIME 1.2698 sec  
F2 41.50 MHz  
P1 12.00  
RG 19.35  
INSTRUM IH  
PROBHD 5  
SOLVENT CDCl3  
NUC1 13C  
NUC2 13C  
RGAIN 19.35

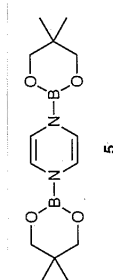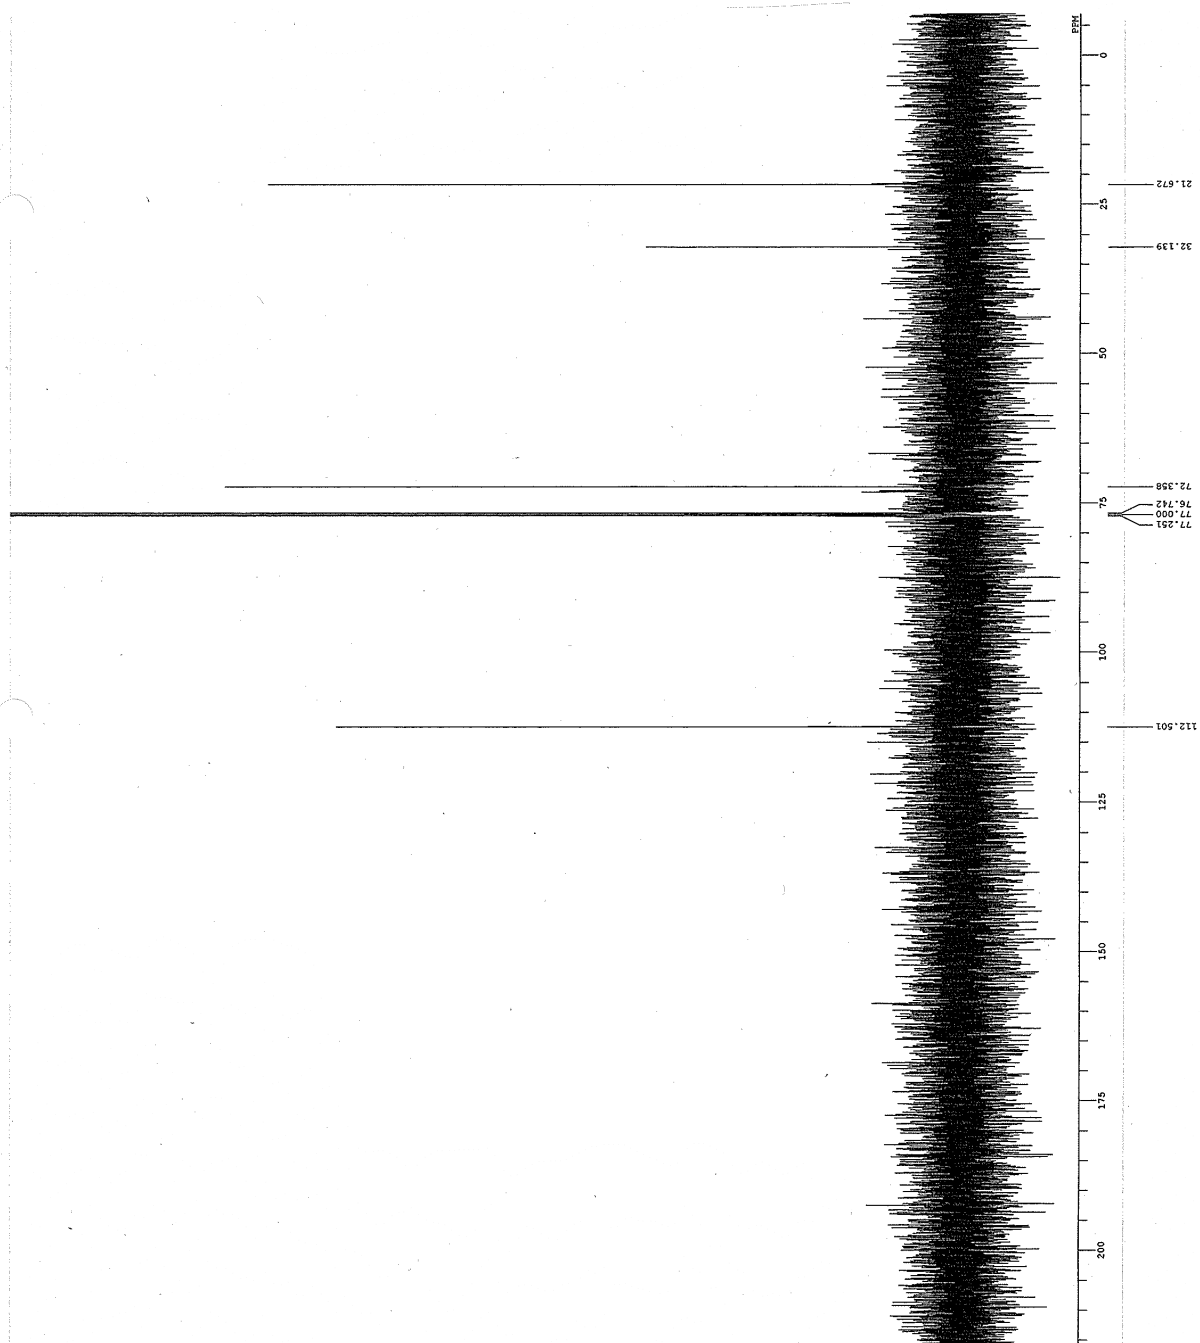

STANDARD CARBON PARAMETERS

File: home/vnmr1/vnmrSYS/data/oshima/K03296-B-CDCl3.fid

Pulse Sequence: s2pul

Solvent: cdcl3  
Ambient temperature  
Operator: vnmz1  
File: K03296-B-CDCl3  
VNMR5-400 "400MR-2nd"

Relax. delay 1.371 sec  
Pulse 45.0 degrees  
Acq. time 0.629 sec  
Width 26041.7 Hz  
16 repetitions  
OBSERVE B11, 128.2985581 MHz  
DECOUPLE H1, 399.8855346 MHz  
Power 42 dB  
on during acquisition  
off during delay  
WALTZ-16 modulated  
DATA PROCESSING  
Line broadening 5.0 Hz  
FT size 32768  
Total time 17 min, 4 sec

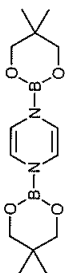

5

Broad background signal from NMR tube is observed because we used a NMR tube made of borosilicate glass. For the background signal, see the final page of this Supporting Information.

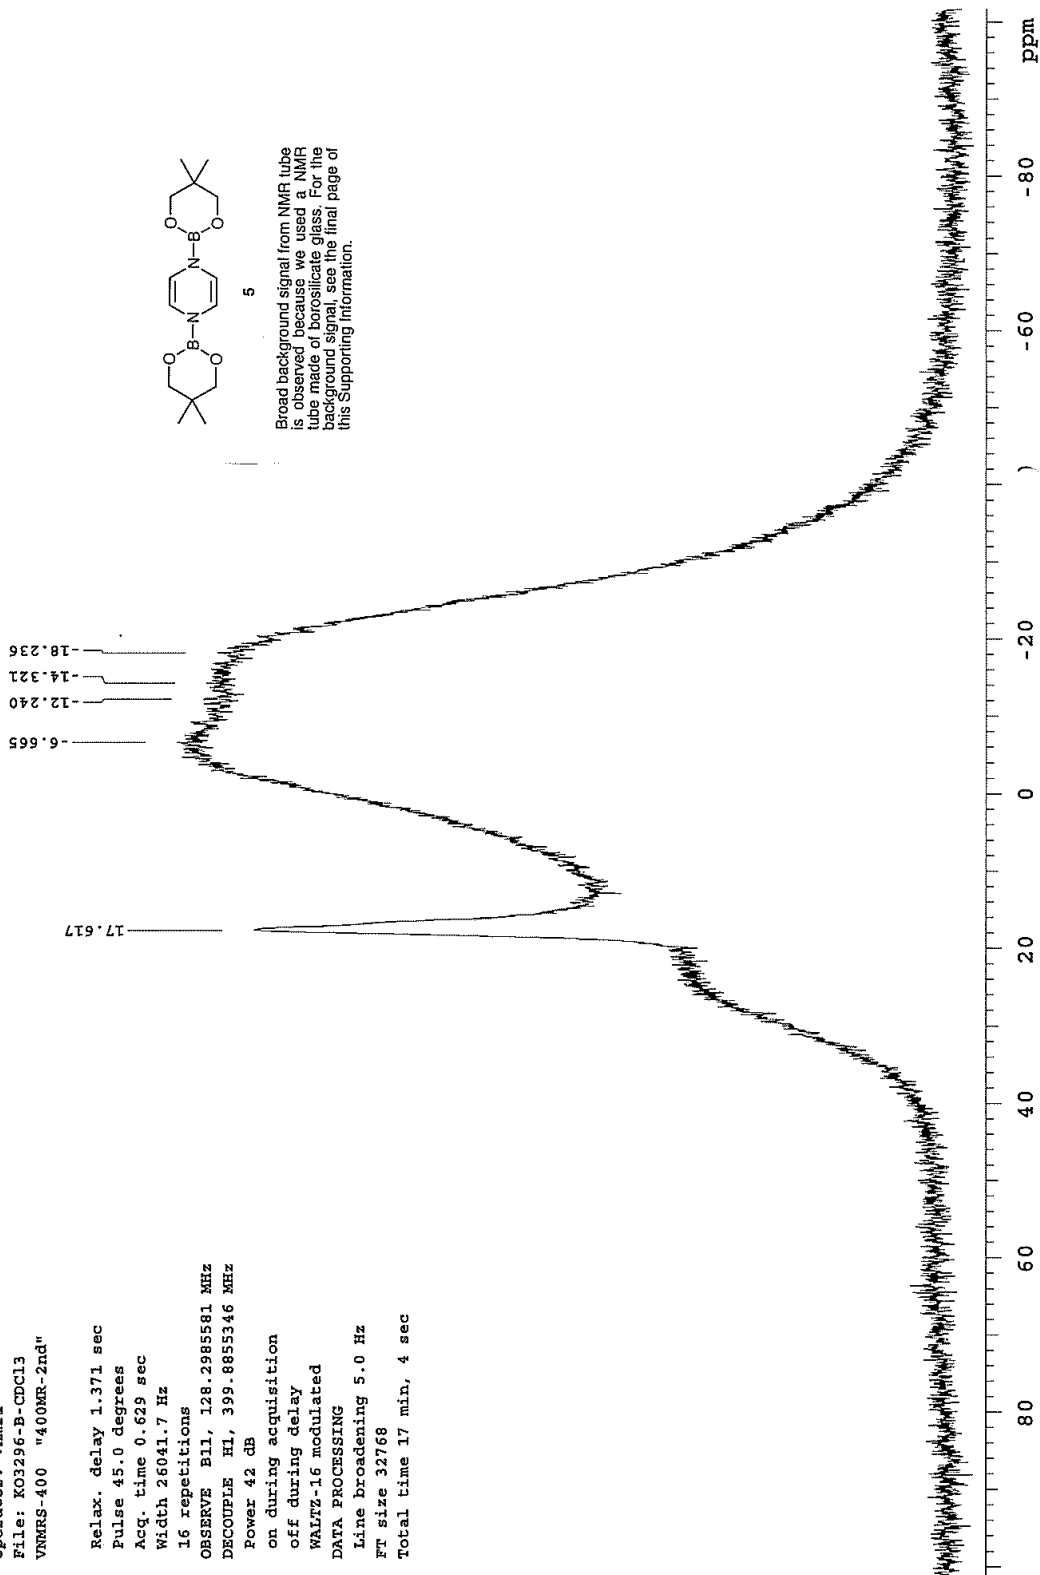

STANDARD PROTON PARAMETERS

File: home/vnmr1/vnmrsys/data/oshima/KO3273-H-re-CDCl3.fid

Pulse Sequence: s2pul

Solvent: cdcl3

Ambient temperature

Operator: vnmr1

File: KO3273-H-re-CDCl3

VNMR5-400 "400MR-2nd"

Relax. delay 1.500 sec

Pulse 45.0 degrees

Acq. time 3.500 sec

Width 6410.3 Hz

12 repetitions

OBSERVE H1, 399.8835280 MHz

DATA PROCESSING

Line broadening 0.2 Hz

FT size 65536

Total time 10 min, 40 sec

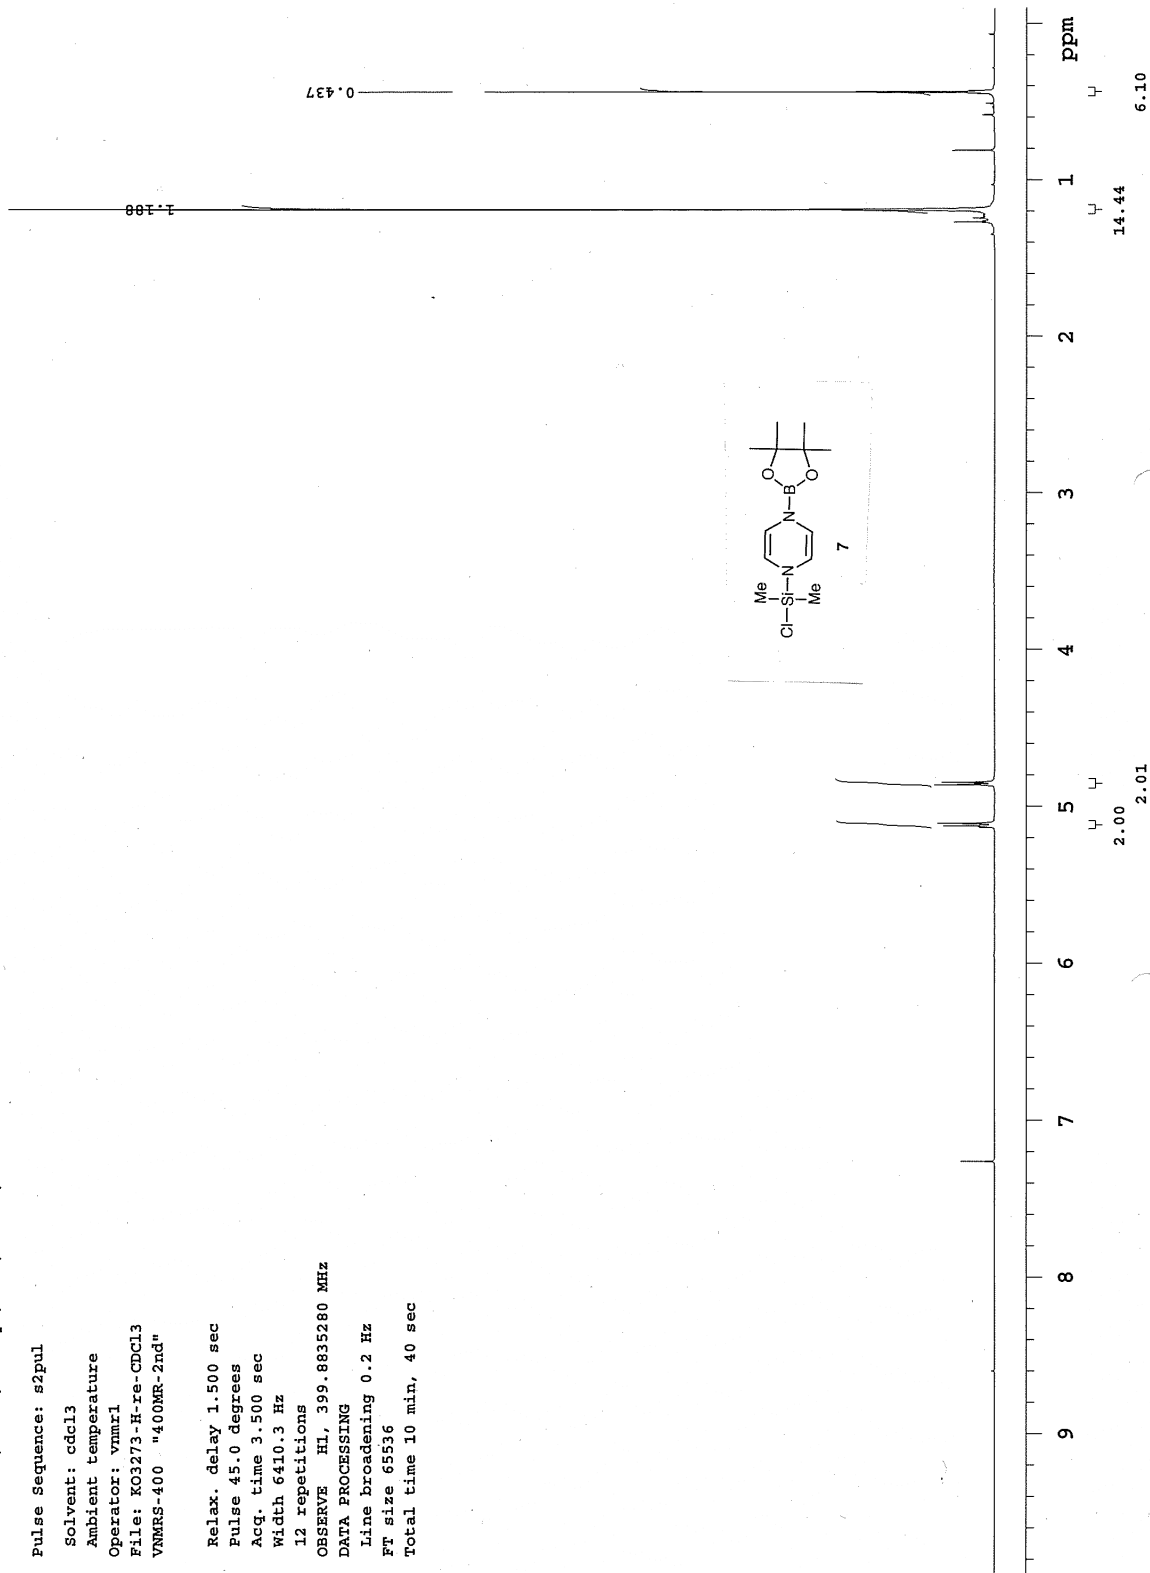

DFILE \_DEFAULT.ALS  
COMMENT  
DATEM Sat Mar 03 01:46:20 20  
ORNUC 13C  
EXMOD SINGL  
ORFREQ 125.65 MHz  
ORFIN 128449.48 Hz  
POINT 32768  
FREOU 28011.20 Hz  
SCANS 280  
ACQTM 1.1698 sec  
PD 2.0000 sec  
PWI 4.50 usec  
IRNUC 1H  
CTEMP 21.6 C  
SIVANT CDCl3  
EXREF 77.00 ppm  
BF -0.10 Hz  
RGAIN 33

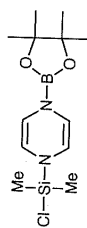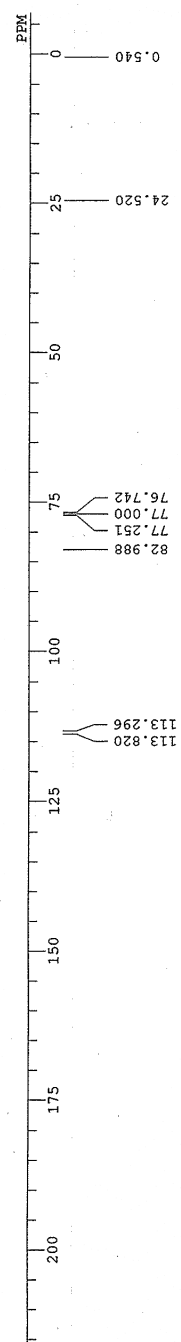

STANDARD CARBON PARAMETERS

File: home/vnmr1/vnmrsys/data/oshima/KO3273-B-CDCl3.fid

Pulse Sequence: s2pul

Solvent: cdcl3  
Ambient temperature  
Operator: vnmr1  
File: KO3273-B-CDCl3  
VNMRS-400 "400MR-2nd"

Relax. delay 1.371 sec  
Pulse 45.0 degrees  
Acq. time 0.629 sec  
Width 26041.7 Hz  
16 repetitions  
OBSERVE B1, 128.2985597 MHz  
DECOUPLE H1, 399.8855346 MHz  
Power 42 dB  
on during acquisition  
off during delay  
WALTZ-16 modulated  
DATA PROCESSING  
Line broadening 5.0 Hz  
FT size 32768  
Total time 17 min, 4 sec

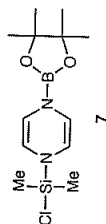

Broad background signal from NMR tube is observed because we used a NMR tube made of borosilicate glass. For the background signal, see the final page of this Supporting Information.

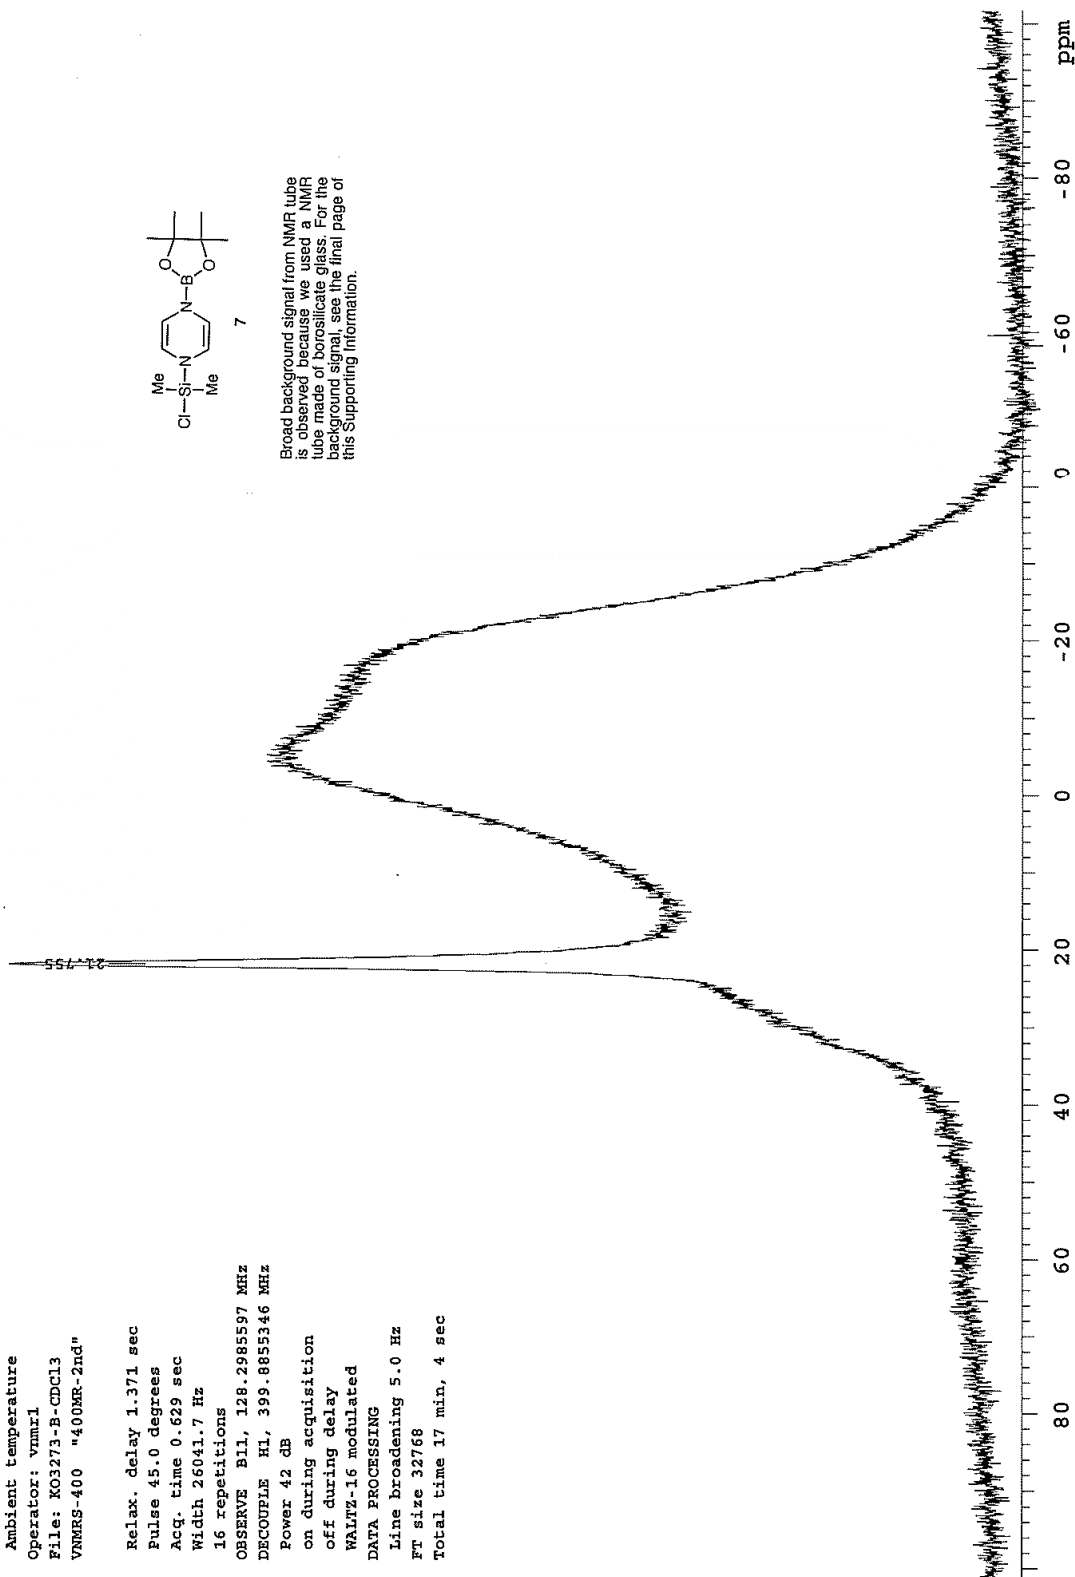

STANDARD PROTON PARAMETERS

File: home/vnmr1/vnmrSYS/data/oshima/KO3298-evapo-H-CDCl3.fid

Pulse Sequence: s2pul

Solvent: cdcl3  
Ambient temperature  
Operator: vnmr1  
File: KO3298-evapo-H-CDCl3  
VNMRS-400 "400MR-2nd"

Relax. delay 1.500 sec  
Pulse 45.0 degrees  
Acq. time 3.500 sec  
Width 6410.3 Hz  
8 repetitions

OBSERVE H1, 399.8835282 MHz  
DATA PROCESSING  
Line broadening 0.2 Hz  
FT size 65536  
Total time 10 min, 40 sec

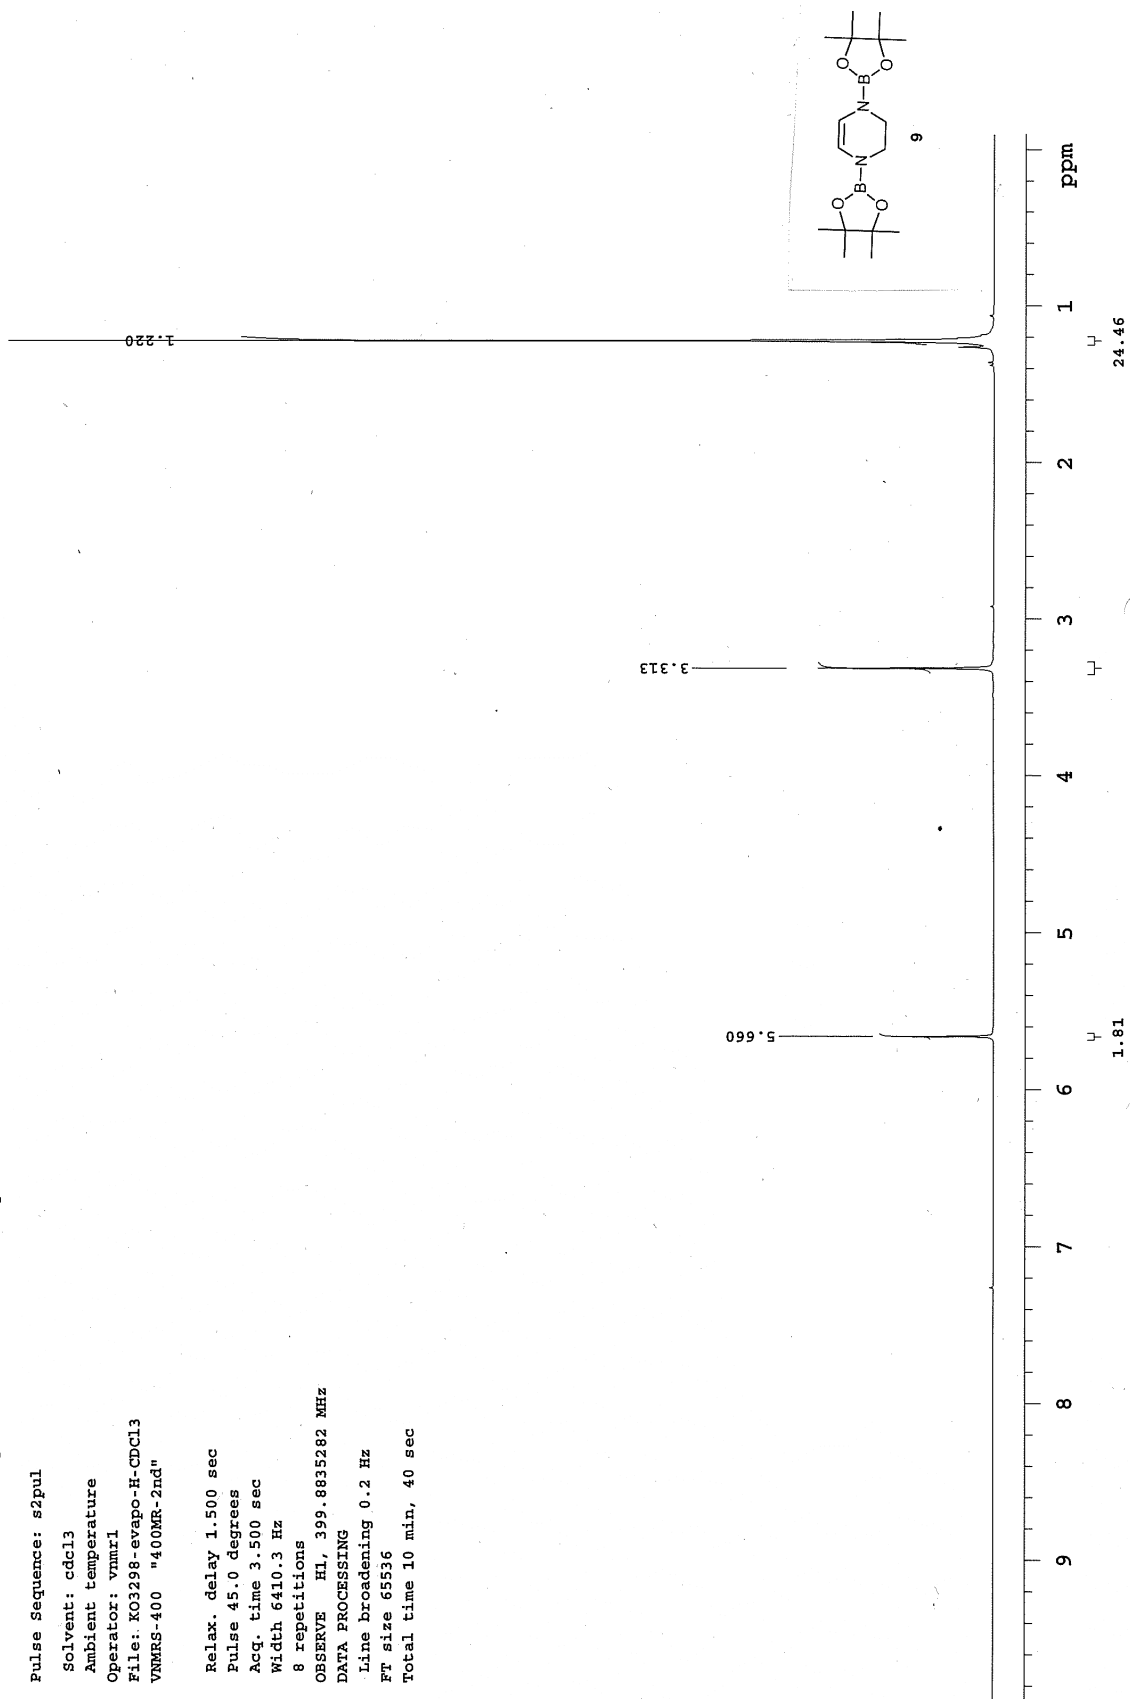



C:\NMR\ESI\COCC\CA\_DEFAULT.ALS

DFILE \_DEFAULT.ALS  
CONV F1 Mar 16 12:30:18 2012  
CHNAC 13C  
PULPROG zgpg30  
SFO 125.60 MHz  
AQ 128445.48 Hz  
RG 128445.48 Hz  
FREQ 125.60 MHz  
SCANS 1  
DELTA 1.80  
PC 2.0000 sec  
PD 0.0000 sec  
PDEL 0.0000 sec  
PRG 1H  
RG 4.50 usec  
SFO 400.146 MHz  
CT 21.5 c  
SLANT 0DC13 71.00 Hz  
RF 12.64 MHz  
BF 0.19 Hz  
RGAIN 33

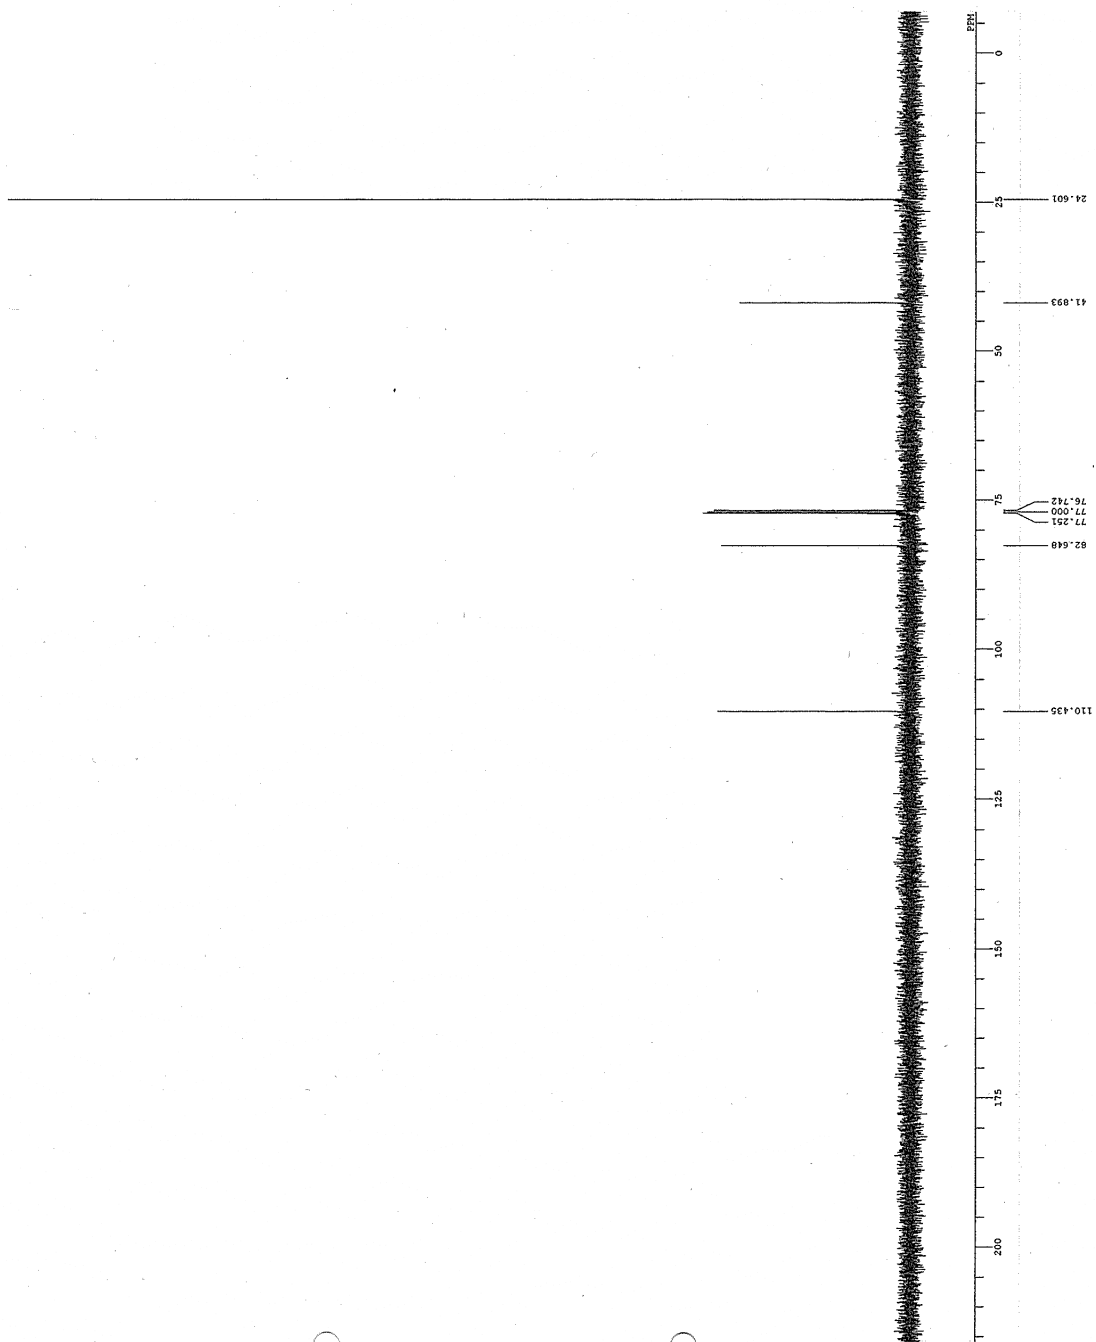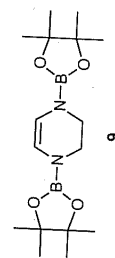

STANDARD CARBON PARAMETERS

File: home/vnmr1/vnmrsys/data/oshima/KO3298-B-CDCl3.fid

Pulse Sequence: s2pul

Solvent: cdcl3  
Ambient temperature  
Operator: vnmr1  
File: KO3298-B-CDCl3  
VNMRS-400 "400MR-2nd"

Relax. delay 1.371 sec  
Pulse 45.0 degrees  
Acq. time 0.629 sec  
Width 26041.7 Hz

12 repetitions  
OBSERVE B11, 128.2985581 MHz  
DECOUPLE H1, 399.8855346 MHz  
Power 42 dB

on during acquisition  
off during delay  
WALTZ-16 modulated  
DATA PROCESSING  
Line broadening 5.0 Hz  
FT size 32768  
Total time 17 min, 4 sec

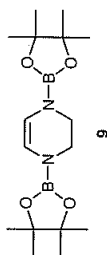

9

Broad background signal from NMR tube is observed because we used a NMR tube made of borosilicate glass. For the background signal, see the final page of this Supporting Information.

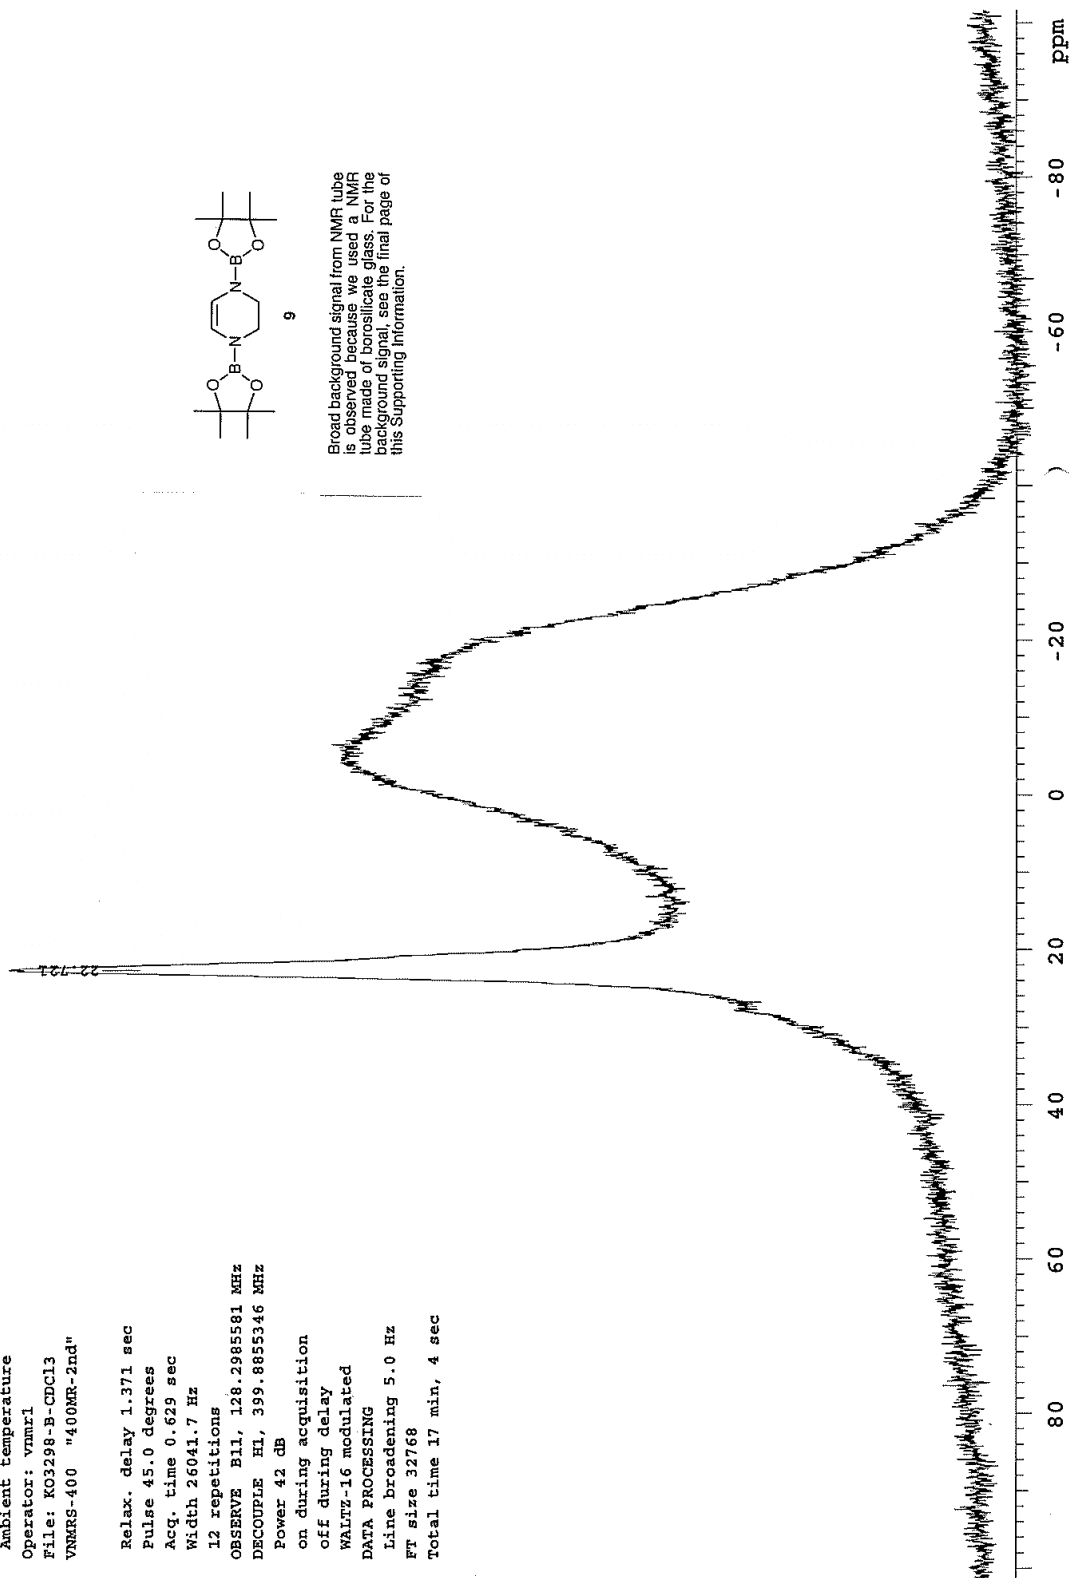

STANDARD CARBON PARAMETERS

File: home/vnmr1/vnmrsys/data/Torigoe/cdcl3-NMRtube-11B.fid

Pulse Sequence: s2pul

Solvent: cdcl3  
Ambient temperature  
Operator: vnmr1  
File: CDCl3-NMRtube-11B  
VNMRS-400 "400MR-2nd"

Relax. delay 1.371 sec  
Pulse 45.0 degrees  
Acq. time 0.629 sec  
Width 26041.7 Hz  
100 repetitions  
OBSERVE B1, 128.2985645 MHz  
DECODEPLE H1, 399.8855346 MHz  
Power 42 dB  
on during acquisition  
off during delay  
WALTZ-16 modulated  
DATA PROCESSING  
Line broadening 5.0 Hz  
FT size 32768  
Total time 17 min, 4 sec

Background signal from NMR tube

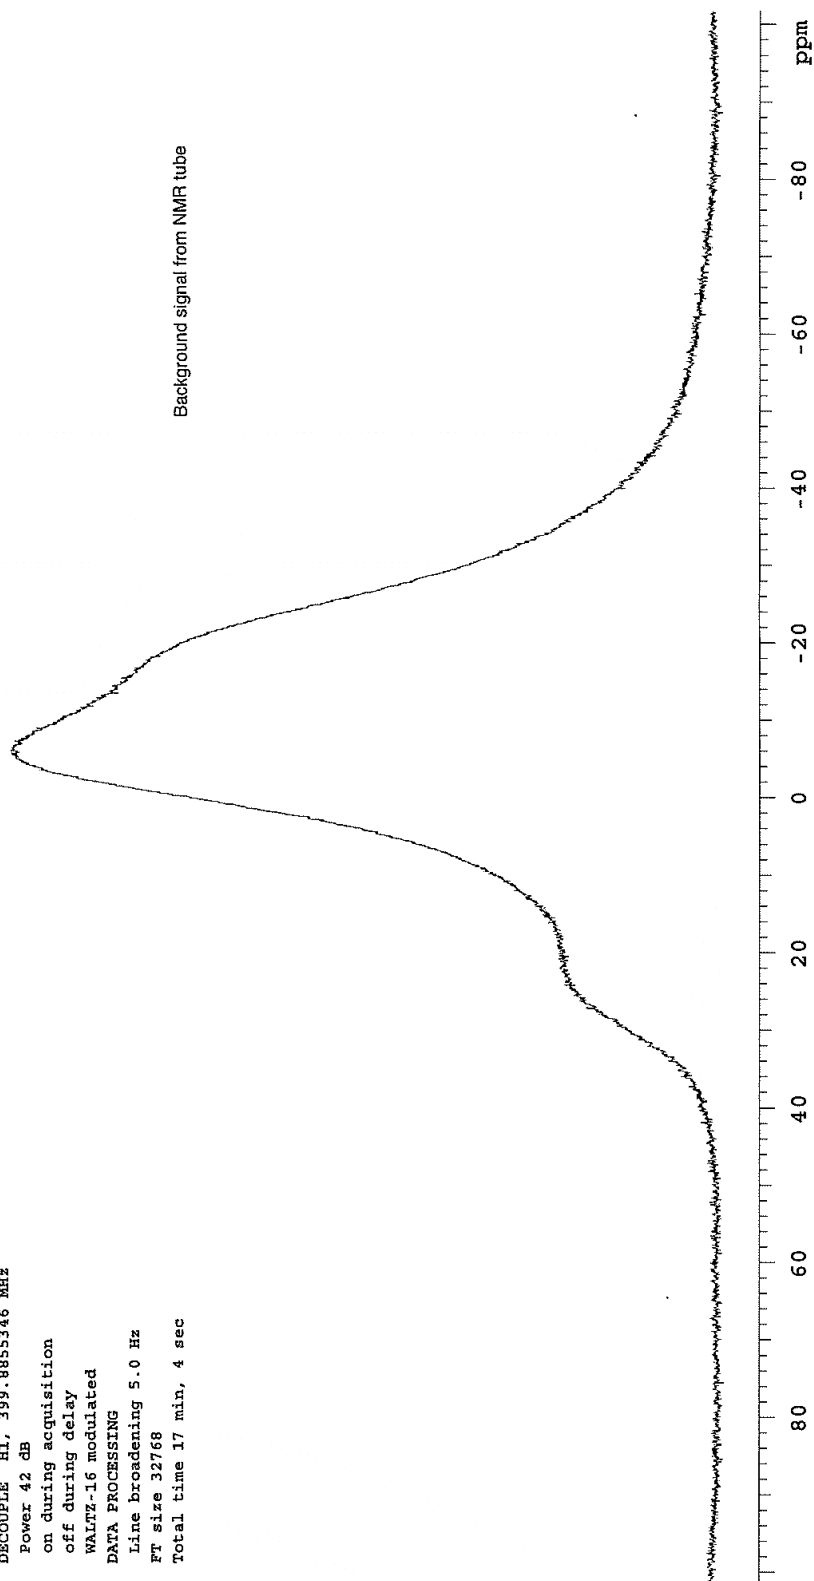

Supplement: c2cc34086k.pdf [file c2cc34086k.pdf]
